# Supplementary material for: Can a sleep disorder intervention-embedded self-management programme contribute to improve management of diabetes? A pilot single-arm pretest and post-test study
Source: PubMed Central journal article supplement — BMJ Open. 2021 Sep 21;11(9):e045783. doi: 10.1136/bmjopen-2020-045783 (PMC8458311; doi:10.1136/bmjopen-2020-045783), 2021-09-21

## Let's check if you have sleep problems (Physical aspect)

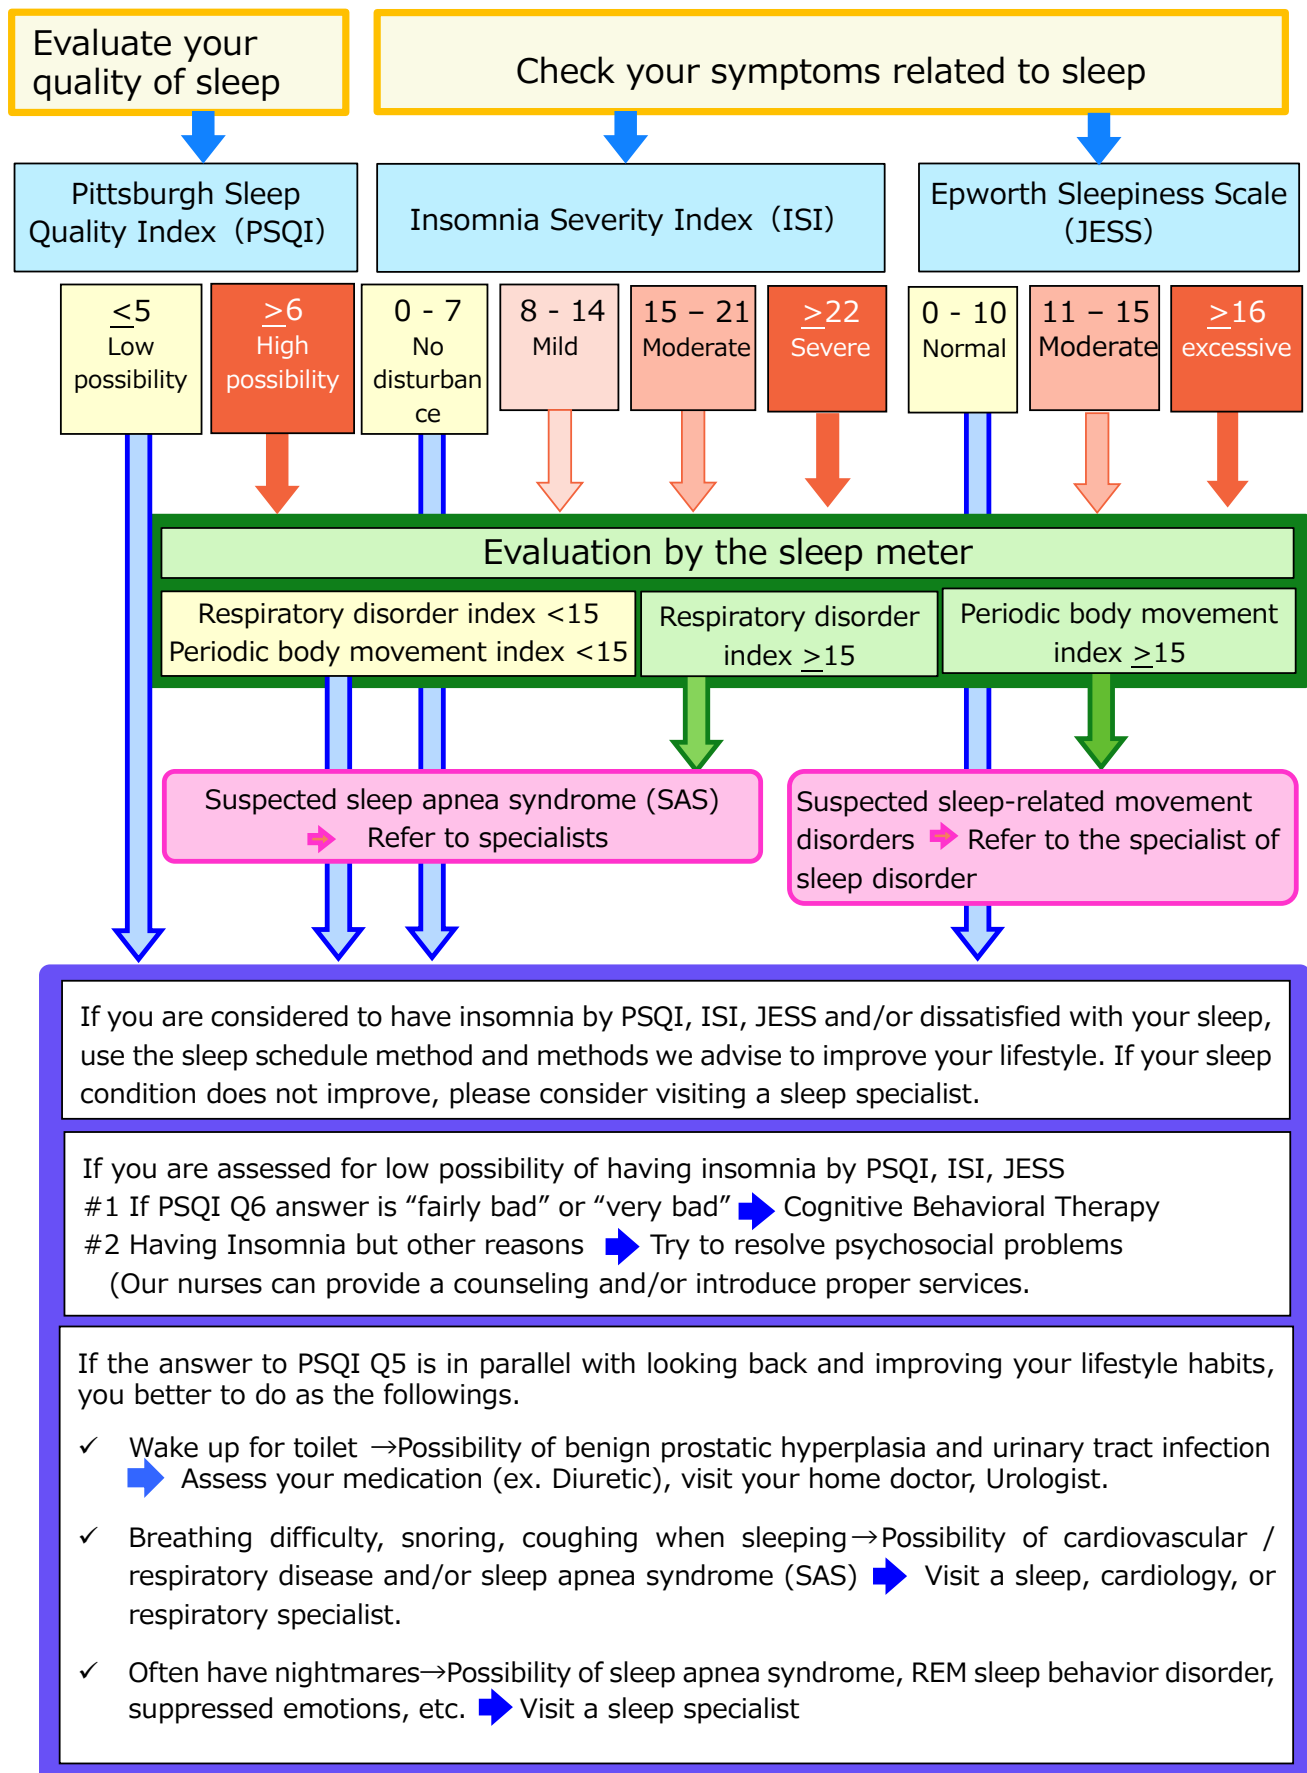

# Let's objectively evaluate the quantity and quality of sleep

Example Mr. A) ·Take over-the-counter sleep-improving drugs  
·He is aware that "the sleep is so bad that I drop the futon"

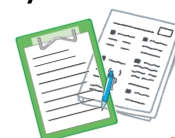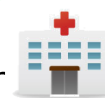

- Pittsburgh Sleep Quality Index(PSQI) 5 score···No sleep disorder
- Insomnia Severity Index (ISI) 8 score ····· Mild insomnia
- Measurement by the sleep meter

At home, place a sleep meter under a mattress and measure for a week, you can understand The quality of sleep during sleep, the state of breathing and heartbeat, and the following

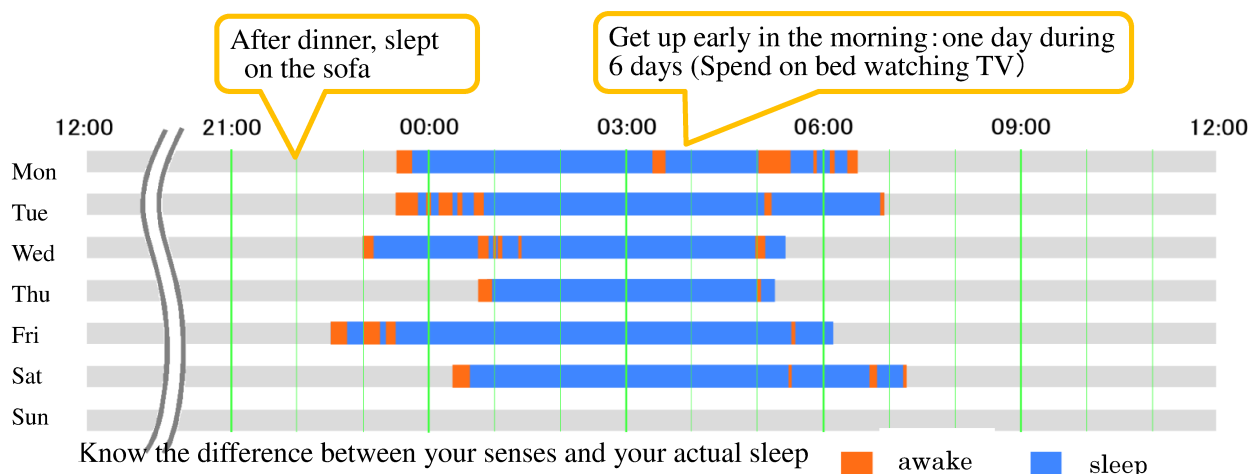

| Items recorded   | Self-report | Measurement  | Remarks                                                      |
|------------------|-------------|--------------|--------------------------------------------------------------|
| Total sleep time | 5 hours     | 5 : 50 hours | Changes depending on individual differences and seasons.     |
| Time for bed     | 0 : 00      | 23 : 49      |                                                              |
| Sleep latency    | 20 min      | 12 min       |                                                              |
| Wake-up time     | 5 : 50      | 6 : 14       | It is desirable to have a constant time to wake up every day |

| Item Measured                  | Measured        | Desirable | Evaluation                                                                                                  |
|--------------------------------|-----------------|-----------|-------------------------------------------------------------------------------------------------------------|
| Sleep efficiency               | 90%             | 95% over  | Percentage of time to go to bed-get up from bed and actual sleep time                                       |
| Respiratory event index        | 8.1 times/h     |           | Possibility of SAS. $\geq 15$ is a guideline for consultation with a specialist                             |
| Periodic body movement index   | 12.5 times/h    |           | Possibility of periodic limb movement disorder. $\geq 15$ is a guideline for consultation with a specialist |
| Activity score                 | 29.2 counts/min |           | The higher the value, the more you are acting while sleeping.                                               |
| Respiratory rate               | Mean 15.9/min   | 12-20/min | Increases or decreases when there is apnea syndrome etc.                                                    |
| Heart rate (HR)                | Mean 57.8/min   | 50-90/min | If your average HR is high, you may have heart or thyroid disease, anemia, anxiety or depression.           |
| Wakefulness after sleep onset  | 20.3 min        | <20 min   | If it is too much, sleep efficiency (sleep quality) will decrease.                                          |
| Number of out-of-bed instances | 0.3 times       | <1 times  | The number of times you have left for toilet, etc. Possible effects of diuretics and enlarged prostate.     |

※ 1) EEG, 2) EOG, and 3) EMG are essential to medically evaluate the quantity and quality of sleep.

Based on your prior checklist, the category you checked is the problem area

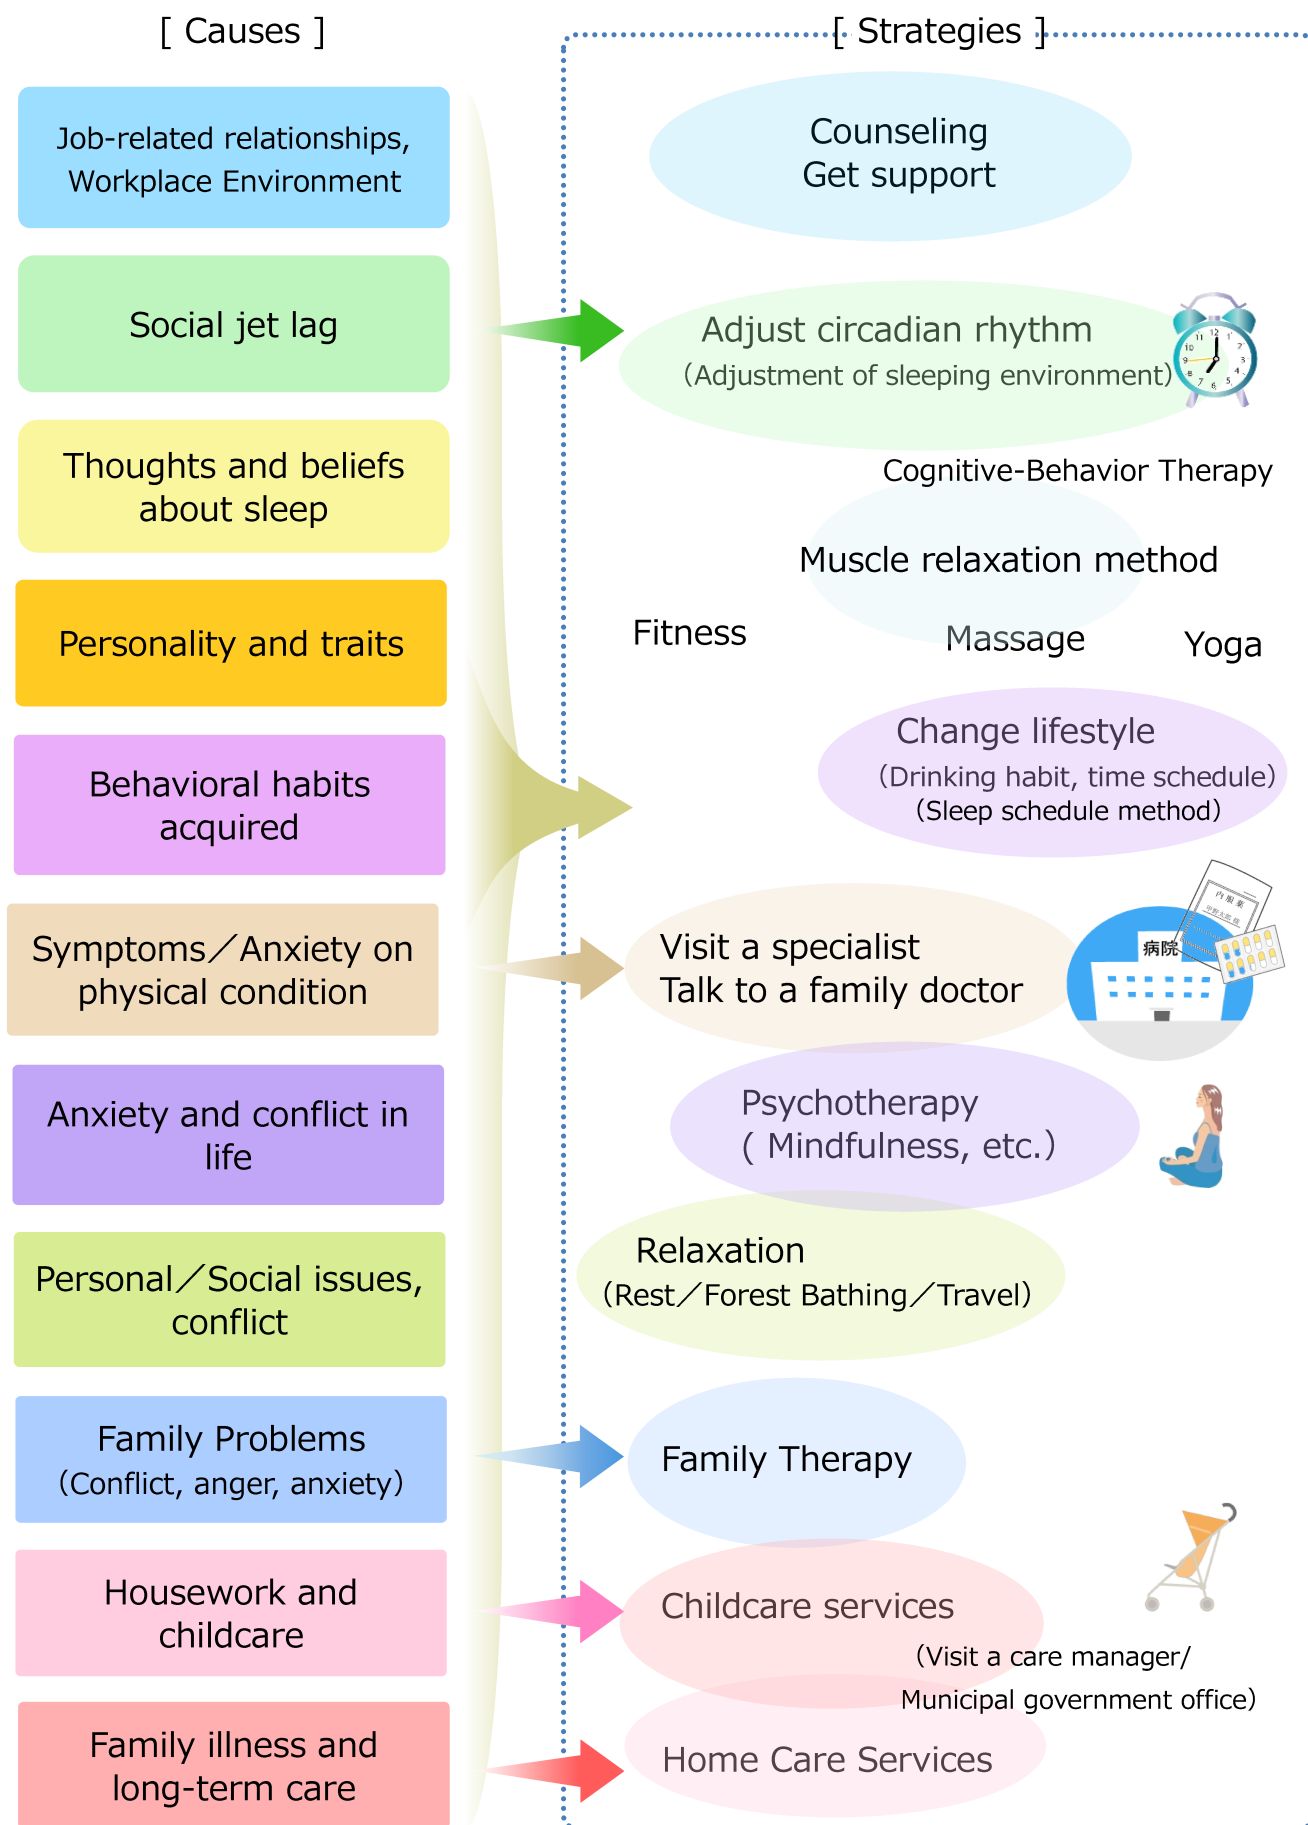

Supplement: bmjopen-2020-045783supp002.pdf [file bmjopen-2020-045783supp002.pdf]
