# Supplementary material for: Can a sleep disorder intervention-embedded self-management programme contribute to improve management of diabetes? A pilot single-arm pretest and post-test study
Source: PubMed Central journal article supplement — BMJ Open. 2021 Sep 21;11(9):e045783. doi: 10.1136/bmjopen-2020-045783 (PMC8458311; doi:10.1136/bmjopen-2020-045783), 2021-09-21
Supplement: bmjopen-2020-045783.draft_revisions.pdf [file bmjopen-2020-045783.draft_revisions.pdf]

# BMJ Open

BMJ Open is committed to open peer review. As part of this commitment we make the peer review history of every article we publish publicly available.

When an article is published we post the peer reviewers' comments and the authors' responses online. We also post the versions of the paper that were used during peer review. These are the versions that the peer review comments apply to.

The versions of the paper that follow are the versions that were submitted during the peer review process. They are not the versions of record or the final published versions. They should not be cited or distributed as the published version of this manuscript.

BMJ Open is an open access journal and the full, final, typeset and author-corrected version of record of the manuscript is available on our site with no access controls, subscription charges or pay-per-view fees (<http://bmjopen.bmj.com>).

If you have any questions on BMJ Open's open peer review process please email [info.bmjopen@bmj.com](mailto:info.bmjopen@bmj.com)

# BMJ Open

## Can a sleep disorder intervention program contribute to improve management of diabetes? A pilot single-arm pre- and post-test study

|                               |                                                                                                                                                                                             |
|-------------------------------|---------------------------------------------------------------------------------------------------------------------------------------------------------------------------------------------|
| Journal:                      | <i>BMJ Open</i>                                                                                                                                                                             |
| Manuscript ID                 | bmjopen-2020-045783                                                                                                                                                                         |
| Article Type:                 | Original research                                                                                                                                                                           |
| Date Submitted by the Author: | 12-Oct-2020                                                                                                                                                                                 |
| Complete List of Authors:     | Sakamoto, Ritsuko<br>Kazawa, Kana; Hiroshima University, Graduate School of Biomedical and Health Sciences<br>Jahan, Yasmin<br>Takeyama, Naoko<br>Moriyama, Michiko ; Hiroshima University, |
| Keywords:                     | General diabetes < DIABETES & ENDOCRINOLOGY, SLEEP MEDICINE, Change management < HEALTH SERVICES ADMINISTRATION & MANAGEMENT, EDUCATION & TRAINING (see Medical Education & Training)       |
|                               |                                                                                                                                                                                             |

SCHOLARONE™  
Manuscripts

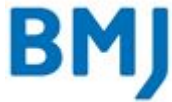

I, the Submitting Author has the right to grant and does grant on behalf of all authors of the Work (as defined in the below author licence), an exclusive licence and/or a non-exclusive licence for contributions from authors who are: i) UK Crown employees; ii) where BMJ has agreed a CC-BY licence shall apply, and/or iii) in accordance with the terms applicable for US Federal Government officers or employees acting as part of their official duties; on a worldwide, perpetual, irrevocable, royalty-free basis to BMJ Publishing Group Ltd ("BMJ") its licensees and where the relevant Journal is co-owned by BMJ to the co-owners of the Journal, to publish the Work in this journal and any other BMJ products and to exploit all rights, as set out in our [licence](#).

The Submitting Author accepts and understands that any supply made under these terms is made by BMJ to the Submitting Author unless you are acting as an employee on behalf of your employer or a postgraduate student of an affiliated institution which is paying any applicable article publishing charge ("APC") for Open Access articles. Where the Submitting Author wishes to make the Work available on an Open Access basis (and intends to pay the relevant APC), the terms of reuse of such Open Access shall be governed by a Creative Commons licence – details of these licences and which [Creative Commons](#) licence will apply to this Work are set out in our licence referred to above.

Other than as permitted in any relevant BMJ Author's Self Archiving Policies, I confirm this Work has not been accepted for publication elsewhere, is not being considered for publication elsewhere and does not duplicate material already published. I confirm all authors consent to publication of this Work and authorise the granting of this licence.

1  
2  
3  
4 **Title: Can a sleep disorder intervention program contribute to improve management of**  
5  
6  
7 **diabetes? A pilot single-arm pre-and post-test study**  
8  
9

10  
11  
12  
13 **AUTHORS**  
14

15  
16  
17 Ritsuko Sakamoto, RN, MSN<sup>1</sup>), Kana Kazawa RN, PHN, Ph.D<sup>1</sup>), Yasmin Jahan, MBBS,  
18  
19 MPH<sup>1</sup>), Naoko Takeyama RN, MSN<sup>1</sup>), Michiko Moriyama RN, Ph.D<sup>1</sup>)  
20  
21  
22  
23  
24  
25

26  
27 **AFFILIATIONS**  
28

29  
30 <sup>1</sup>) Graduate School of Biomedical and Health Sciences, Hiroshima University  
31  
32  
33  
34

35 **CORRESPONDENCE TO:** Kana Kazawa, RN, MSN, Ph.D.  
36

37  
38 Assistant Professor, Division of Nursing Science, Graduate School of Biomedical and  
39  
40 Health Sciences, Hiroshima University. Kasumi 1-2-3 Minami-ku, Hiroshima, 734-8553  
41  
42  
43 Japan, TEL & FAX +81-82-257-5369, e-mail: [kkazawa@hiroshima-u.ac.jp](mailto:kkazawa@hiroshima-u.ac.jp)  
44  
45  
46  
47  
48  
49  
50  
51  
52  
53  
54  
55  
56  
57  
58  
59  
60

1  
2  
3  
4 **Can a sleep disorder intervention program contribute to improve management of**  
5  
6  
7 **diabetes? A pilot single-arm pre-and post-test study**  
8  
9

10  
11  
12  
13 **ABSTRACT**  
14  
15

16 **Objective** To investigate the efficacy and feasibility of a self-management education  
17  
18 program incorporating sleep improvement and activity enhancement for improving diabetes  
19  
20 outcomes.  
21  
22

23  
24  
25 **Design** A single-arm pre-and post-test.  
26  
27

28 **Participants** Participants were aged 52-74 years and diagnosed with type 2 diabetic  
29  
30 nephropathy stage 1 to 3 (estimated glomerular filtration rate  $\geq 30$  ml/min/1.73m<sup>2</sup>).  
31  
32

33  
34 **Interventions** They received self-management education from nurses for 6 months. First, the  
35  
36 nurses assessed their sleep conditions using insomnia scales and a sleep meter. Then, the  
37  
38 participants learned how to self-manage, increase their physical activity, and improve their  
39  
40 sleep condition. They also implemented diet therapy and took their medicine as prescribed.  
41  
42  
43

44  
45  
46 **Outcome measures** Physiological indicators, subjective and objective indicators of sleep  
47  
48 quality, self-management indicators, and quality of life (QOL) were evaluated. To confirm  
49  
50 the efficacy of intervention, Freidman tests, analysis of variance, Wilcoxon signed rank test,  
51  
52 and t-test were performed. Next, we compared the results between participants with and  
53  
54  
55  
56  
57  
58  
59  
60

1  
2  
3  
4 without sleep disorders using t-test and Mann-Whitney U test. Pearson's correlations between  
5  
6  
7 activities and sleep condition were analyzed.  
8  
9

10 **Results** Of the 26 enrolled participants, 24 completed the program and were analyzed.

11  
12  
13 Among them, 15 participants (62.5%) had sleep disorders caused by multiple factors, such as  
14  
15  
16 an inappropriate lifestyle and physical factors that interferes with good sleep. After the  
17  
18  
19 intervention, sleep meter scores improved in five participants. Although insomnia scales did  
20  
21  
22 not change for the sleep-disorders, their subjective health status improved. Regarding  
23  
24  
25 indicators related to diabetes management, lifestyles improved significantly. Hemoglobin  
26  
27  
28 A1c, body mass index, systolic blood pressure, non-HDL-cholesterol, and QOL also  
29  
30  
31 improved.  
32  
33

34 **Conclusion** This program was effective in improving diabetes status, lifestyle and behavior  
35  
36  
37 changes. However, its effect on sleep condition was limited because of the program  
38  
39  
40 complexity. A simple and novel approach is needed to strengthen the motivation for sleep  
41  
42  
43 behavior change and to increase its efficacy and feasibility.  
44  
45

46 **Keywords** diabetes, sleep disorder, self-management  
47  
48  
49  
50  
51

52 **Strengths and limitations of this study**  
53  
54  
55  
56  
57  
58  
59  
60

- To extract the potential sleep disorders, we used a sleep meter as an objective assessment in addition to a subjective sleep assessment.
- We developed the comprehensive self-management program incorporating sleep disorder with serious consequences for diabetes mellitus management.
- Our limitations relate to strong statistical power, as this project was a pilot study, and a small sample size and a non-controlled study design was implemented.

## INTRODUCTION

The relationship between sleep disorders and impaired glucose tolerance (IGT) is receiving expanded consideration around the world due to the negative health outcomes. Several studies indicated that people with sleep disorders, such as insomnia, are at increased risk of diabetes mellitus (DM).<sup>1-3</sup>

As DM and IGT are associated with a higher risk for developing cardiovascular disease and death, prevention or management of these health problems is an important public health goal.

This can be achieved by keeping up a healthy lifestyle through the consumption of a balanced diet and exercising while getting sufficient rest, which is equally important.<sup>4</sup> Studies have demonstrated that sleep disorders may disturb glucose homeostasis in complex ways, such as by inducing excessive secretion of stress hormones. In particular, sleep disturbances such as

1  
2  
3  
4 intermittent hypoxia, short sleep duration, and sleep fragmentation led to increase sympathetic  
5  
6  
7 nervous activation, systemic inflammation, oxidative stress release, and hormonal  
8  
9  
10 dysregulation. This, in turn, changes to metabolic dysfunction (insulin resistance,  $\beta$ -cell  
11  
12  
13 dysfunction and glucose intolerance) and reduced leptin levels along with a rise in ghrelin  
14  
15  
16 levels, leading to appetite up-regulation and weight gain.<sup>5-8</sup> Several studies found that sleep  
17  
18  
19 disturbance influences to be emphatically related to obesity and type 2 DM.<sup>9-10</sup> Other studies  
20  
21  
22 reported that obesity and aging, which are risk factors for developing DM, affected the onset  
23  
24  
25 and severity of obstructive sleep apnea syndrome (OSAS). In diabetic patients, OSAS  
26  
27  
28 prevalence is detailed to be 23-48%. Thus, OSAS severity is associated with insulin  
29  
30  
31 resistance.<sup>11-12</sup> In addition, diabetic patients may have sleep-inhibitory conditions, such as  
32  
33  
34 restless legs syndrome, pain due to peripheral neuropathy, and frequent urination due to  
35  
36  
37 hyperglycemia.<sup>13</sup> Epidemiological studies have also found that sleep disturbances in diabetic  
38  
39  
40 patients to be correlated not only with glycemic control but also with lower self-care adherence  
41  
42  
43 and quality of life (QOL).<sup>14-15</sup> Therefore, we focused on sleep disorders since these are serious  
44  
45  
46 problems in diabetic patients, and often need to be addressed by non-pharmacologic  
47  
48  
49 interventions such as sleep management.

50  
51  
52 Furthermore, in the management of DM, exercise therapy has led to improvement of insulin  
53  
54  
55 resistance, the advancement of glucose uptake by muscle contraction amid exercise, the  
56  
57  
58



1  
2  
3  
4 enhancement of lipid abnormalities from the norm and cardiopulmonary function, and  
5  
6  
7 improvement of subjective well-being and self-esteem.<sup>16-17</sup> Regarding the relationship between  
8  
9  
10 exercise and sleep, it has been reported that performing an exercise of moderate intensity  
11  
12  
13 significantly improves the efficiency and quality of sleep.<sup>18</sup> In addition, obesity reduction  
14  
15  
16 through exercise improves respiratory-related sleep disorders such as OSAS, resulting in  
17  
18  
19 improved glycemic control.<sup>12</sup> From the above statements, it can be anticipated that increasing  
20  
21  
22 physical activity may improve the sleep quality of diabetic patients. However, diabetic patients  
23  
24  
25 with complications such as cardiovascular diseases and neuropathy must be carefully assessed  
26  
27  
28 and monitored for exercise-induced risk.<sup>19-20</sup>

29  
30  
31 Regarding intervention measures for sleep disorders, several studies suggested that significant  
32  
33  
34 changes in sleep disorders are introduced by non-pharmacological approaches.<sup>21</sup> Non-  
35  
36  
37 pharmacologic treatment of sleep disorders include interventions such as sleep hygiene  
38  
39  
40 education, relaxation, stress management, and cognitive therapy.<sup>21-22</sup> Those interventions as a  
41  
42  
43 self-management education for DM may improve their lifestyle, subjective insomnia  
44  
45  
46 evaluation indices, and blood glucose levels.<sup>23</sup> Currently, sleep management is of utmost  
47  
48  
49 importance in managing DM.<sup>15</sup> However, few studies considered that thoroughly addressed  
50  
51  
52 non-pharmacological treatments in diabetic patients by screening for sleep disorders using both  
53  
54  
55  
56  
57  
58  
59  
60

1  
2  
3  
4 subjective and objective assessment as well as by analyzing the characteristics of the factors  
5  
6  
7 that interfere with sleep.  
8  
9

10 Regarding the subjective evaluation of quantity and quality of sleep, there are the following  
11  
12 scales whose reliability and validity are verified respectively; Pittsburg Sleep Quality Index  
13  
14 (PSQI) for screening sleep disorders and assessing the quality of sleep,<sup>24</sup> Insomnia Severity  
15  
16 Index (ISI) to assess the severity of insomnia,<sup>25</sup> Epworth Sleepiness Scale (ESS) to assess the  
17  
18 specific sleep disorders with daytime hypersomnia.<sup>26</sup> With regard to the objective evaluation  
19  
20 of sleep, devices such as a sleep meter and an apnea sleep monitor are used for screening sleep  
21  
22 disorders and evaluating sleep characteristics. DM with autonomic neuropathy that caused by  
23  
24 hyperglycemia may have difficulty in perceiving sleep disorder.<sup>27</sup> Therefore, it is exceptionally  
25  
26 noteworthy to use a subjective index and an objective index together to multilaterally assess  
27  
28 the characteristics of sleep disorders for a diabetic patient. Nonetheless, there are few DM  
29  
30 programs that select the most appropriate improvement strategies depend on the consequences  
31  
32 of an assessment of the types and causes of sleep disorders. There are no reports discussing  
33  
34 which of the multiple subjective and objective evaluation tools is most suitable to use.  
35  
36  
37  
38  
39  
40  
41  
42  
43  
44  
45  
46  
47  
48

49 From the above, our study wanted to evaluate the efficacy of a diabetic nephropathy self-  
50  
51 management program incorporating sleep disorder assessment and education in improving DM  
52  
53 management as well as outcomes. We also wanted to compare the efficacy of the program on  
54  
55  
56  
57  
58  
59  
60

1  
2  
3  
4 diabetic patients with and without sleep disorders. Since this is a pilot study, a simpler method  
5  
6  
7 (choice of tools in evaluating and screening sleep disorders) for screening sleep disorders was  
8  
9  
10 clinically used to check the feasibility. Specifically, we set the following questions: (1) does  
11  
12  
13 this self-management program that incorporates sleep assessment and strengthens activity  
14  
15  
16 improve behavioral changes, physiological indicators and QOL? (2) when the patients were  
17  
18  
19 divided into those with sleep disorders and those without sleep disorders, was diabetic  
20  
21  
22 nephropathy more markedly improved in those with sleep disorders? (3) did the enhanced  
23  
24  
25 activities contribute towards an improved sleep condition? (4) did the participants accept this  
26  
27  
28 program of sleep assessment and self-management education? (5) what were the preferred tools  
29  
30  
31 for accurately identifying sleep disorders?  
32  
33  
34  
35  
36

## 37 **METHODS**

### 38 **Study design**

39  
40  
41 This was a pilot, open-label, single-arm, pre-and post-design study conducted among  
42  
43  
44 outpatients with diabetic nephropathy implemented in a community-based location of  
45  
46  
47 Hiroshima Prefecture, Japan.  
48  
49  
50  
51  
52  
53  
54

### 55 **Participants**

1  
2  
3  
4 Participants were aged between  $\geq 20$  and  $\leq 74$  years old and diagnosed with type 2 DM.  
5  
6

7 Inclusion criteria were: 1) diabetic nephropathy stages 1 to 3 (estimated glomerular filtration  
8 rate; eGFR)  $\geq 30$  ml/min/1.73m<sup>2</sup>),<sup>28</sup> 2) undergoing treatment of DM on an outpatient basis, 3)  
9  
10 insured by National Health Insurance living in Hiroshima City; Union National Health  
11  
12 Insurance, the insurer of Japan Health Insurance Association, Hiroshima chapter; and the  
13  
14 National Federation of Health Insurance Societies of Hiroshima living in Hiroshima Prefecture.  
15  
16  
17  
18  
19  
20  
21

22 Exclusion criteria: Patients were excluded if any of the following criteria presents: 1) presence  
23  
24 of type 1 or secondary DM; 2) currently hospitalized; 3) undergoing renal replacement therapy  
25  
26 or planning to begin undergoing renal replacement therapy within the next 6 months; 4)  
27  
28 pregnant at the time of the study; 5) in terminal stages; 6) cognitively impaired (score  $\leq 20/30$   
29  
30 on the revised version of Hasegawa's dementia scale; HDS-R,<sup>29</sup> 7) judged by the nurses/primary  
31  
32 physicians to be unable to implement any kind of activity required in this study, or 8) already  
33  
34 registered in other clinical trials. Patients who were on any kind of sleeping drugs or  
35  
36 psychotropic drugs were not excluded.  
37  
38  
39  
40  
41  
42  
43  
44  
45

46 This is an exploratory pilot study, therefore sample size calculation was not performed.  
47  
48  
49  
50  
51

## 52 **Recruitment and registration**

53  
54  
55  
56  
57  
58  
59  
60

1  
2  
3  
4 Participants were introduced from primary physicians. After the nurses checked the  
5  
6  
7 participants for eligibility, they obtained informed consent and registered them for this study  
8  
9  
10 between January to December 2017.  
11  
12  
13  
14  
15

### 16 **Evaluation of outcomes and data collection schedule**

17  
18  
19 To evaluate the efficacy and feasibility of the program, incorporating sleep-disorder assessment  
20  
21  
22 and strengthening exercises, the following parameters were assessed:  
23  
24

- 25 - Physiological indicators: body mass index (BMI), systolic blood pressure (SBP), diastolic  
26  
27 blood pressure (DBP), hemoglobin A1c (HbA1c), estimated glomerular filtration rate  
28  
29 (eGFR), non-high-density lipoprotein-cholesterol (non-HDL-c), and triglycerides.  
30  
31
- 32 - Subjective measurement of sleep quality; using: (1) the Insomnia Severity Index, Japanese  
33  
34 version (ISI) to evaluate the severity of primary insomnia (Cut-off point  $\geq 8$ );<sup>30</sup> (2) the  
35  
36 Pittsburgh Sleep Quality Index, Japanese version (PSQI) to collect information on various  
37  
38 domains of sleep including sleep latency, sleep length, sleep efficiency, sleep difficulty,  
39  
40 use of sleeping pills, difficulty in waking during the day, and secondary insomnia such as  
41  
42 OSAS (Cut-off point  $\geq 6$ );<sup>31</sup> and (3) the Epworth Sleepiness Scale, Japanese version (ESS)  
43  
44  
45  
46  
47  
48  
49 to evaluate the excessive daytime sleepiness (Cut-off point  $\geq 11$ ).<sup>32</sup>  
50  
51  
52  
53  
54  
55  
56  
57  
58  
59  
60

- 1  
2  
3  
4 - Objective measurement of sleep quality: A sensor mat type sleep meter (Nemuri SCAN  
5  
6  
7 NN-1310; Paramount bed Co., Ltd) was used to distinguish sleep and wakefulness using  
8  
9  
10 polysomnography, which is the gold standard for a sleep evaluation. The device had a  
11  
12  
13 matching rate above 92% and can be laid under a bed mattress as well as used easily at  
14  
15  
16 home. This device records wakeup time, sleep time, bedtime, sleep latency, sleep  
17  
18  
19 efficiency (%), time spent awake, number of times to get up, respiratory disorder index,  
20  
21  
22 periodic body movement index, amount of activity, respiratory rate, heart rate, sleep/wake  
23  
24  
25 tapestry (graph showing sleep and wake patterns are color-coded). It then evaluates sleep  
26  
27  
28 on a scale from 1 to 4 (good), where 3 implies no abnormality, 2 implies attention  
29  
30  
31 required, and 1 implies improvement required. A score of 2 or less implies a possible  
32  
33  
34 sleep disorder.  
35  
36
- 37 - Acquisition of self-management behavior: the nurse asked the participants for the  
38  
39  
40 frequency of blood pressure (BP) and body weight self-monitoring, diet (eating vegetables  
41  
42  
43 first, etc.), and activity/exercise. Activity/exercise level was measured as the total number  
44  
45  
46 of steps per day using a pedometer (Lifecorder ® GF, SUZUKEN CO., LTD., Japan).  
47  
48
- 49 - Health-related QOL: EuroQOL-5D-5L, Japanese version was administered to evaluate the  
50  
51  
52 overall outcome of this program.<sup>33</sup> This questionnaire evaluates five items (mobility, self-  
53  
54  
55 care, usual activities, pain/discomfort, and anxiety/depression), with each item evaluated  
56  
57  
58  
59  
60

1  
2  
3  
4 on a scale of 1 to 5 (no problems, slight problems, moderate problems, severe problems,  
5  
6  
7 and extreme problems). For the subjective health status included in the EuroQOL, the  
8  
9  
10 participants make a self-assessment of his/her health using a scale from 0 (worst condition)  
11  
12  
13 to 100 (best condition). The EuroQOL-5D-5L was scored using tariffs.

14  
15  
16 During the 6-month intervention period, physiological and self-management indicators were  
17  
18  
19 collected every three months, while data regarding other variables were collected at baseline  
20  
21  
22 and at 6 months. All indicators were collected from the participants.

### 23 24 25 26 27 28 **Definition of sleep disorder**

29  
30  
31 Sleep disorders include seven major categories in the International Classification of Sleep  
32  
33  
34 Disorders-Third Edition: insomnia, sleep-related breathing disorders, central disorders of  
35  
36  
37 hypersomnolence, circadian rhythm sleep-wake disorders, sleep-related movement disorders,  
38  
39  
40 parasomnias, and other sleep disorders.<sup>34</sup> In this study, we defined patients with sleep disorders  
41  
42  
43 as those having been diagnosed with a sleep disorder at a specialist clinic and/or those having  
44  
45  
46 awareness of their insomnia for more than one month and meeting at least one criteria (ISI  $\geq$  8  
47  
48  
49 points, PSQI  $\geq$  6 points, JESS  $\geq$  11 points) on the sleep questionnaire or via sleep meter's  
50  
51  
52 comprehensive judgment.  
53  
54  
55  
56  
57  
58  
59  
60

## **Self-management program incorporating sleep improvement and activity/exercise enhancement and procedure for the intervention**

Figure 1 describes the framework of the intervention program of this study. The program was originally designed for patients to acquire skills for self-management of their diabetes and diabetic nephropathy.<sup>35-36</sup> The program was implemented for 6 months and monitored via face-to-face and telephone interviews.

After patient enrollment, the nurses performed a comprehensive assessment of laboratory test results; physical conditions; lifestyle practices such as diet, activities/exercise, drug adherence, alcohol, and smoking, and psychosocial status of the participants; as well as discussed the aggravating factors of DM. The nurses also explained the basics of the pathophysiology and self-management of DM using educational textbooks created by researchers. The nurse and the participant set together with the monthly goals and action plans for behavioral changes. The nurses educated the participants on various self-monitoring methods (measurement and evaluation of BP and body weight).<sup>37</sup>

With regard to increasing physical activity, the nurses introduced participants to a fitness club if the participant did not have medical risks based on initial assessment by a primary physician.

If the participant had medical risks for attending a fitness club or refused to attend, the nurses prescribed tailored exercises based on their physical tolerance and preference. For all



1  
2  
3  
4 participants, the nurses lent a pedometer and asked them to account for their activity for one  
5  
6  
7 week on baseline measurements. Visits to the fitness club were scheduled once a week during  
8  
9  
10 the first three months, with attendance being voluntary after this period. At the fitness club, a  
11  
12  
13 health fitness programmer held classes, approximately 60 minutes in duration, which involved  
14  
15  
16 walking, stretching, squatting, and gymnastics (exercise intensity was about 3 to 5 Mets).

17  
18  
19 Screening, evaluation, and intervention for sleep disorders: Three subjective assessment scales  
20  
21  
22 (ISI, PSQI, and ESS) were administered to screen and were evaluated the characteristics of the  
23  
24  
25 participants' sleeping states. For those who were evaluated as having a sleep disorder on these  
26  
27  
28 scales and/or those who had a BMI of 30 or more (high chance to have SAS), a sleep meter  
29  
30  
31 was lent to them by the nurses with instructions on their use also provided, and they were asked  
32  
33  
34 to use the device for one week. After the sleep meter was returned, the conditions of the  
35  
36  
37 participant's sleep disorders, based on the subjective evaluation scale and the results of the  
38  
39  
40 sleep meter, was explained to them by the nurses. The nurses used a researcher-developed  
41  
42  
43 textbook in which the pathology, factors causing sleep disorders, and methods used to both  
44  
45  
46 deal with the problem as well as promote sleep hygiene was explained. The participants and  
47  
48  
49 the nurses then discussed how to solve the problem. The nurses contacted a specialist to  
50  
51  
52 evaluate those with a moderate or higher levels of sleep disorders or suspected SAS. Those  
53  
54  
55  
56  
57  
58  
59  
60

1  
2  
3  
4 who were subjectively evaluated as not having any sleep disorders were also provided with  
5  
6  
7 prophylactic general sleep hygiene education using the textbook.  
8  
9

10 After the first session, the participants implemented the action plan and recorded their self-  
11  
12  
13 monitoring values in a notebook. The nurses evaluated the implementation of the action plan  
14  
15  
16 through face-to-face consultations (once every 2<sup>nd</sup> and 3<sup>rd</sup> month) and biweekly phone calls,  
17  
18  
19 with revisions to the implemented action plan when necessary.  
20  
21  
22  
23  
24

### 25 **Data analysis**

26  
27  
28 Normality was confirmed for each item, descriptive statistics were calculated, and Friedman  
29  
30  
31 tests, analysis of variance (ANOVA), Wilcoxon signed rank test, t-tests, and Mann-Whitney U  
32  
33  
34 test were performed (where appropriate) before and after the intervention. Pearson's  
35  
36  
37 correlations between activities and sleep condition were analyzed. The significance level was  
38  
39  
40 set at 5%. SPSS software version 26.0 (Inc., Chicago, IL) was used for analysis.  
41  
42  
43  
44  
45

### 46 **Ethical consideration**

47  
48  
49 The study protocol was approved by Hiroshima University Ethics Committee (No. C-140).  
50  
51  
52 Written informed consent was obtained from each participant. This study was conducted under  
53  
54  
55 the health insurance system of Japan and performed in accordance with the Declaration of  
56  
57  
58  
59  
60

1  
2  
3  
4 Helsinki and the Ethical Guidelines on Clinical Studies of the Ministry of Health, Labour and  
5  
6  
7 Welfare of Japan. This study is registered under the following ID: UMIN000025906.  
8  
9  
10  
11  
12

## 13 **RESULTS**

### 16 **Baseline characteristics of the participants**

17  
18  
19 Twenty-nine participants were introduced from five primary physicians, among them 26 met  
20  
21 the eligibility criteria and were enrolled. Of the 26 patients, 17 were male (65.4%), and the  
22  
23 mean age was  $65.7 \pm 6.0$  years. Two participants dropped out right after enrollment. Therefore,  
24  
25 only 24 participants completed the 6-month program and were included in the analysis (Fig.  
26  
27  
28 2). Of the 24 participants, 15 (62.5 %) were classified as having sleep disorders. Eleven  
29  
30 participants (45.8%) had sleep disorders based on any of the sleep questionnaires (ISI, PSQI,  
31  
32 JESS). Eight had an ISI score of 8 or greater, nine had a PSQI score of 6 or greater, and two  
33  
34 had an ESS score of 11 or greater. In addition, 13 out of the 15 (86.7%) participants who agreed  
35  
36 to use a sleep meter had sleep disorders. However, four of them were not screened as having  
37  
38 sleep disorders based on the sleep questionnaire (i.e. those who were not aware that their sleep  
39  
40 quality was poor indeed) (Table 1). In contrast, two participants were screened as having sleep  
41  
42 disorders on the sleep questionnaire but assessed as “No abnormality” on the sleep meter. Of  
43  
44  
45  
46  
47  
48  
49  
50  
51  
52  
53  
54  
55  
56  
57  
58  
59  
60

1  
2  
3  
4 the three questionnaires, PSQI could identify the most sleep disorders and the identified sleep  
5  
6  
7 disorders that could not be extracted by other scales.  
8  
9

10 According to the nurses' comprehensive assessment of 15 participants, factors which disturbed  
11  
12  
13 sleep included inappropriate lifestyle behaviors such as intake of alcohol before going to bed,  
14  
15  
16 lack of activity during the daytime, and using a computer or smartphone before going to bed.  
17  
18  
19 We also found most participants have several other physical conditions, like polyuria and pain.  
20  
21  
22 Suspected SAS and periodic limb movement disorders were also found in six and three  
23  
24  
25 participants, respectively.  
26  
27  
28  
29  
30

### 31 **Efficacy of the program (one-way analysis)**

32  
33  
34 To examine the efficacy of this program, baseline conditions were compared to outcomes  
35  
36  
37 during the 3rd and 6th months of intervention (Table 2, Figure 3). BMI, SBP, non-HDL-c, and  
38  
39  
40 HbA1c improved significantly ( $p < 0.05$ ). Renal functions (eGFR) did not change. QOL score  
41  
42  
43 and subjective health status also improved significantly ( $p < 0.05$ ). In terms of the sleep  
44  
45  
46 questionnaires, there was no significant difference between the scores before and after the  
47  
48  
49 intervention [median (interquartile range) = 1 (1 - 2), 2 (1 - 2.25), respectively,  $p = 0.317$ ,  $Z =$   
50  
51  
52 -1.000]. Activity levels measured by steps were maintained but did not show any significant  
53  
54  
55  
56  
57  
58  
59  
60

1  
2  
3  
4 improvement ( $p = 0.271$ ). Changes in self-management as well as all behaviors improved  
5  
6  
7 significantly ( $p < 0.05$ ).  
8  
9

10 One participant started while another was being tapered off antihypertensive medication during  
11  
12 the study. There was no change in the prescription for hypoglycemic drugs. One participant  
13  
14 was being tapered off insulin. Finally, no participant had started taking sleep medicine during  
15  
16 the study.  
17  
18  
19  
20  
21  
22  
23  
24

### 25 **Comparison of the results between participants with and without sleep disorders**

26  
27  
28 To examine which had better effects on those with sleep disorders, the results of the groups  
29  
30 with and without sleep disorders were compared (Table 3). There were no significant  
31  
32 differences between the baseline characteristics of the two groups. Even though the divided  
33  
34 sample size was small and difficult to compare, participants with sleep disorders had higher  
35  
36 BMI, BP, and lipid profile, as well as lower renal function and subjective health status at  
37  
38 baseline. No significant differences were found when the two groups were compared in terms  
39  
40 of changes in each of the evaluation outcomes at 6 months. Notably, the group with sleep  
41  
42 disorders had greater improvements in subjective health status compared to the group without  
43  
44 sleep disorders. Despite this program's purpose to improve sleep quality, scores on the three  
45  
46 subjective sleep metrics remained unchanged.  
47  
48  
49  
50  
51  
52  
53  
54  
55  
56  
57  
58  
59  
60

1  
2  
3  
4 In contrast, although most of the participants who were evaluated as having sleep disorder by  
5  
6  
7 the sleep meter had no significant difference between the scores before and after intervention  
8  
9  
10 [median (interquartile range) = 1 (1 - 2), 2 (1 - 2), respectively,  $p = 0.206$ ,  $Z = -1.265$ ], five of  
11  
12  
13 the 12 participants showed improvement.  
14  
15  
16  
17  
18

### 19 **Relationship between enhanced activities and improvement of sleep condition**

20  
21  
22 In this study, we provided sleep hygiene education to all participants. Therefore, we analyzed  
23  
24  
25 the relationship between changes in sleep status and changes in exercise frequency at the end  
26  
27  
28 of the program (6 months) for all 24 participants (Figure 4). The results showed that the ISI  
29  
30  
31 score (insomnia severity) and exercise amount (number of steps per day) were moderately  
32  
33  
34 negatively correlated ( $r=0.395$ ,  $p=0.056$ ). In other words, the greater the amount of exercise,  
35  
36  
37 the lower the severity of insomnia and the better the quality of sleep. There were positive  
38  
39  
40 relationships among the PSQI (degree of sleep disorder) scores, ESS (sleepiness in the daytime)  
41  
42  
43 scores, scores on the sleep meter, and exercise frequency, but these were not statistically  
44  
45  
46 significant.  
47  
48  
49  
50  
51

### 52 **Evaluation of the program**

53  
54  
55  
56  
57  
58  
59  
60

1  
2  
3  
4 All participants except one (96%) were satisfied with this program, the nurses' intervention,  
5  
6  
7 and the fitness club for those who attended it. In contrast, the use of the sleep meter and the  
8  
9  
10 consultation that the nurse gave regarding sleep disorders were not evaluated well (it was  
11  
12  
13 evaluated as "useful" by 36% and 30%, respectively).  
14

15  
16 Attending a fitness club was highly evaluated based on the free comments, as the participants  
17  
18  
19 acquired exercise habits and had fun learning the correct techniques of doing the exercises.  
20

21  
22 Participants who underwent sleep assessment and consultation were more likely to  
23  
24  
25 acknowledge the importance of awareness and understanding of their sleep conditions and how  
26  
27  
28 they were related to DM. For instance, one participant reported that his snoring disappeared.  
29

30  
31 In contrast, most participants tended to make negative comments stating that the use of the  
32  
33  
34 sleep meter was bothersome and was difficult to implement and that they were likely to  
35  
36  
37 disengage from using it. Some participants were frustrated and refused to change their  
38  
39  
40 behaviors, saying "*even if you point out the sleep problem, there is no need to change now*  
41  
42  
43 *because there is no discomfort.*"  
44  
45  
46  
47  
48

## 49 **DISCUSSION**

50  
51  
52 In this pilot study, we aimed to develop an effective self-management program for diabetic  
53  
54  
55 nephropathy by incorporating measures with improving sleep and increasing physical  
56  
57  
58  
59  
60

1  
2  
3  
4 activity. In addition, to identify which assessments are appropriate to screen patients' sleep  
5  
6  
7 conditions and conveniently, three subjective sleep questionnaires were administered, while  
8  
9  
10 measurement using a sleep meter was performed for objective assessment.  
11  
12  
13  
14  
15

16 In this study, we found that 62.5% of the patients had sleep disorders, which was higher than  
17  
18 the previously reported studies involving diabetic patients.<sup>38-39</sup> It is important to note that our  
19  
20 study is different from these previous studies, since these evaluated sleep disorders using  
21  
22 subjective surveys. However, in this study, sleep disorders were also objectively evaluated.  
23  
24  
25  
26  
27

28 For instance, there was a person who was not aware that he/she had insomnia, and was only  
29  
30 judged to have a sleep disorder through objective evaluation using a sleep meter. A previous  
31  
32 study reported that diabetic patients may have difficulty in perceiving sleep disorders due to  
33  
34 neuropathy.<sup>27</sup> Therefore, our results suggest that it is useful to identify high-risk individuals  
35  
36 with sleep disorders and conclude that a sleep meter needs to be used first before answering  
37  
38 the questionnaires. This is especially PSQI which broadly identifies insomnia, should be  
39  
40 administered for those who complain of sleep problems even if they have no objective  
41  
42 abnormalities, and those who refuse to use a sleep meter.  
43  
44  
45  
46  
47  
48  
49  
50  
51  
52  
53  
54  
55  
56  
57  
58  
59  
60



1  
2  
3  
4 In terms of preventing aggravation of the early stage of diabetic nephropathy, the  
5  
6  
7 physiological and behavioral results of this study suggest that this combination program was  
8  
9  
10 effective, except for use in sleep interventions despite the small sample size. Our pilot study  
11  
12  
13 found that all the participants showed significant improvements in self-management activities  
14  
15  
16 by eating healthy meals, exercising, and self-monitoring. This resulted in a significant  
17  
18  
19 improvement in BMI, SBP, and HbA1c, which further decreases the future development of  
20  
21  
22 vascular complications by improving risk factors.<sup>40</sup> With regard, the QOL scores and  
23  
24  
25 subjective views on health improved significantly. However, some type 2 diabetic patients  
26  
27  
28 feel the disease-specific distress of having to maintain self-management of DM throughout  
29  
30  
31 their lives.<sup>41-42</sup> The structured behavioral self-management education in this study might have  
32  
33  
34 improved the participants' subjective views on health.<sup>42</sup>  
35  
36  
37  
38  
39

40 As an important point, we set the use of fitness clubs as a part of this program, which led to  
41  
42  
43 an increase in the frequency of exercise and improve satisfaction with daily health. The  
44  
45  
46 evaluation of participants was high in this regard. In terms of behavioral changes, eating  
47  
48  
49 behavior was also improved, which might be due to the fact that it was easy to implement diet  
50  
51  
52 changes prioritizing on the consumption of vegetables first before the other types of food.  
53  
54  
55  
56  
57  
58  
59  
60

1  
2  
3  
4 Significant improvements in both eating and exercising behaviors could contribute  
5  
6  
7 considerable physiological improvement.  
8  
9

10  
11  
12  
13 To evaluate sleep intervention and education, subgroup analyses were performed, with  
14  
15  
16 participants divided into two groups: one group with sleep disorders, and one without. Changes  
17  
18  
19 with the indicators were compared. There was no statistically significant difference at baseline  
20  
21  
22 between the two groups, but interestingly, BMI, SBP, DBP, eGFR, triglyceride levels, non-  
23  
24  
25 HDL-c, and QOL were poor in the sleep disorder group. However, physiological data such as  
26  
27  
28 HbA1c were similarly improved in the group without sleep disorders. Sleep disorders have  
29  
30  
31 been reported to be associated with reduced adherence to self-management.<sup>14</sup> In the present  
32  
33  
34 study, our sleep intervention was failed as mentioned above, with the evaluation of the  
35  
36  
37 participants of sleep education being poor. In contrast, nurses and participants explored factors  
38  
39  
40 impeding DM control and discussed concisely to improve lifestyle behaviors. We believe that  
41  
42  
43 these individually tailored approaches and the use of fitness clubs maintained adherence and  
44  
45  
46 led to behavioral changes, which contributed to the improvement of physiological parameters  
47  
48  
49 in the participants.  
50  
51  
52  
53  
54  
55  
56  
57  
58  
59  
60

1  
2  
3  
4 Regarding the relationship between exercise frequency and changes in sleep state, ISI scores  
5  
6  
7 decreased (improved), and sleep meter score increased (improved) as exercise frequency  
8  
9  
10 increased. This result indicated that, as expected, increasing exercise frequency contributed to  
11  
12  
13 improvements in sleep condition, although statistically significant improvements were not  
14  
15  
16 observed in the quality of sleep itself. Many studies have reported the positive relationship  
17  
18  
19 between exercise and quality of sleep by improving the symptoms seen in respiratory-related  
20  
21  
22 sleep disorders. In addition, continuous exercise and weight loss has been found to improve  
23  
24  
25 glycemic control.<sup>16, 43</sup> These positive effects might have been effected by peer-support and  
26  
27  
28 group dynamics based on comments of participants who made use of the fitness club.<sup>44</sup>  
29  
30  
31 Therefore, in a diabetes education program incorporating sleep improvement, performing  
32  
33  
34 periodic exercise by enrolling in fitness clubs may be beneficial.  
35  
36  
37  
38  
39

40 Participants' evaluation of sleep assessment and nurses' consultation for DM self-  
41  
42  
43 management education and sleep improvement combination program was poor, and the  
44  
45  
46 results did not support the sleep improvement. The participants in this study had poor  
47  
48  
49 glycemic control compared to type 2 DM patients with sleep disorders involved in  
50  
51  
52 interventional studies.<sup>23, 45</sup> In addition, although there was a high prevalence of sleep  
53  
54  
55 disorders in this population and multiple sleep-inhibitory factors such as suspicion of SAS,  
56  
57  
58  
59  
60

1  
2  
3  
4 pain, and unhealthy lifestyles were present in the group with sleep disorders, most  
5  
6  
7 participants did not recognize that they had sleep disorders nor think that it could aggravate  
8  
9  
10 DM. Therefore, there was a need for sleep assessment, motivating, tailored education, and  
11  
12  
13 referral to a specialist. Since DM with sleep disorders have several risk, this program needs to  
14  
15  
16 be implemented for a longer period of time, with the content taught in the following order,  
17  
18  
19 i.e. DM education first and then sleep education/problem-solving, which will be more  
20  
21  
22 realistic and acceptable.  
23  
24  
25  
26  
27

### 28 **Limitations**

29  
30  
31 As this project was a pilot study, a small sample size and a non-controlled study design was  
32  
33  
34 implemented, which made it difficult to analyse with strong statistical power. Additionally,  
35  
36  
37 this was a community-based study (local government project) and complex protocol, which  
38  
39  
40 led to missed acquisition of certain existing data, made the statistical comparison difficult. In  
41  
42  
43 the future, it is necessary to simplify and verify the effect of the program on a larger  
44  
45  
46 population as well as make calculations that take the prevalence of sleep disorders into  
47  
48  
49 consideration. In addition, this study had an intervention period of six months, hence, it is  
50  
51  
52 recommended to establish a longer-term intervention and monitoring period because the  
53  
54  
55  
56  
57  
58  
59  
60

1  
2  
3  
4 unpredictability of the factors can hinder sleep in diabetic patients to completely identify the  
5  
6  
7 impacts of this program.  
8  
9  
10  
11  
12

## 13 **CONCLUSION**

14  
15  
16 We conducted a self-management education program for the patients having up to the 3rd  
17  
18 stage of diabetic nephropathy, which aimed to improve sleep and increase physical activity.  
19  
20 BMI, SBP, HbA1c, QOL scores, and subjective health perceptions of all patients improved  
21  
22 significantly after the intervention. As for sleep-related evaluation indicators, there were  
23  
24 some participants who showed improvement on objective evaluation by the sleep meter, but  
25  
26 remained unchanged when the subjective evaluation index was used. However, improvement  
27  
28 in behavioral and physiological indicators were similar in participants with and without sleep  
29  
30 disorders. From these results, direct impacts of sleep intervention were not observed, but the  
31  
32 necessity of this program became apparent and allowed us to consider approaches to improve  
33  
34 it for its next full-scale implementation.  
35  
36  
37  
38  
39  
40  
41  
42  
43  
44  
45  
46  
47  
48

## 49 **ACKNOWLEDGMENTS**

50  
51  
52 We thank the Hiroshima Prefecture, Division of Integrated Care & Elderly support and the Hiroshima City,  
53  
54 Division of Health & Welfare, Insurance and Pension Section for initiating and funding this project.  
55  
56  
57  
58 Thank you to the study participants as well as their primary physicians.  
59  
60

1  
2  
3  
4 We acknowledge the contribution of Madoka Kawai, RN, Muzuho Yamaguchi, RN, and Mie Fukushima,  
5  
6  
7 RN, who implemented the program.  
8  
9

10 Our sincere thanks to Naoko Matsumoto, MS, her staff; and Health Fitness Programmers from Medical  
11  
12  
13 Fitness B-1, Hiroshima, for the provision of the study's fitness interventions.  
14  
15  
16  
17  
18

### 19 **CONFLICTS OF INTEREST**

20  
21  
22 The authors declare no conflict of interest.  
23  
24  
25  
26  
27

### 28 **CONTRIBUTORSHIP STATEMENTS**

29  
30  
31 Ritsuko Sakamoto was involved in research design, data collection, analysis, and manuscript  
32  
33 writing. Kana Kazawa and Yasmin Jahan were involved in data analysis and manuscript  
34  
35 writing. Naoko Takeyama was involved in program and educational material development.  
36  
37  
38 Michiko Moriyama was involved in overall research design including program development  
39  
40  
41 and manuscript writing. All authors read and approved the final manuscript.  
42  
43  
44  
45  
46  
47  
48

### 49 **FUNDING**

50  
51  
52 This work was supported by a Grant-in-Aid for Scientific Research (B) (No. 15H05078) and  
53  
54  
55 was funded by Hiroshima Prefecture and Hiroshima City as a joint research.  
56  
57  
58  
59  
60

## COMPETING INTERESTS

The authors declare no potential conflicts of interest with respect to the research, authorship, and/or publication of this article.

## DATA SHARING STATEMENT

All data in this study received permission from National Health Insurance, Hiroshima City; Union National Health Insurance, the insurer of Japan Health Insurance Association, Hiroshima chapter; and the National Federation of Health Insurance Societies of Hiroshima, Hiroshima Prefecture. Furthermore, the dataset of this study cannot be shared because it is required in the insurer's ordinance to be used only for insurer-initiated health services.

## REFERENCES

1. Gettlieb DJ, Punjabi NM, Newman AB, *et al.* Association of Sleep Time With Diabetes Mellitus and Impaired Glucose Tolerance. *Arch Intern Med* 2005;165(8):863-7.  
<https://doi:10.1001/archinte.165.8.863>

- 1  
2  
3  
4 2. Cappuccio FP, D'Elia L, Strazzullo P, *et al.* Quantity and quality of sleep and incidence  
5  
6  
7 of type 2 diabetes: a systematic review and meta-analysis. *DIABETES CARE*  
8  
9  
10 2010;33:414-20. <https://doi:10.2337/dc09-1124>  
11  
12
- 13 3. Zizi F, Jean-Louis G, Brown CD, *et al.* Sleep duration and the risk of diabetes mellitus:  
14  
15 epidemiologic evidence and pathophysiologic insights. *Curr Diab Rep* 2010;10(1):43-7.  
16  
17  
18 <https://doi:10.1007/s11892-009-0082-x>  
19  
20  
21
- 22 4. Terada Y, Hirose S, Fujiwara M, *et al.* Association between nighttime sleep duration,  
23  
24 midday naps, and glycemic levels in Japanese patients with type 2 diabetes. *Sleep Med*  
25  
26  
27 2017;44:4–11. <https://doi.org/10.1016/j.sleep.2017.11.1124>  
28  
29  
30
- 31 5. Arora T, Chen MZ, Cooper AR, *et al.* The Impact of Sleep Debt on Excess Adiposity  
32  
33 and Insulin Sensitivity in Patients with Early Type 2 Diabetes Mellitus. *J Clin Sleep Med*  
34  
35  
36 2016;12(5):673-80. <https://doi:10.5664/jcsm.5792>  
37  
38  
39
- 40 6. Lee SWH, Ng KY, Chin WK. The impact of sleep amount and sleep quality on glycemic  
41  
42 control in type 2 diabetes: A systematic review and meta-analysis. *Sleep Med Rev*  
43  
44  
45 2017;31:91-101. <https://doi:10.1016/j.smrv.2016.02.001>  
46  
47  
48
- 49 7. Hirota T, Morioka T, Yoda K, *et al.* Positive association of plasma leptin with sleep  
50  
51 quality in obese type 2 diabetes patients. *J Diabetes Investig* 2018;(5): 1100-5.  
52  
53  
54  
55 <https://doi:10.1111/jdi.12826>  
56  
57  
58  
59  
60



- 1  
2  
3  
4 8. Chattu VK, Chattu SK, Burman D, *et al.* The Interlinked Rising Epidemic of Insufficient  
5  
6  
7 Sleep and Diabetes Mellitus. *Healthcare* 2019;7(1).  
8  
9  
10 <https://doi:10.3390/healthcare7010037>  
11  
12
- 13 9. Spiegel K, Knutson K, Leproult R, *et al.* Sleep loss: a novel risk factor for insulin  
14  
15  
16 resistance and Type 2 diabetes. *J Appl Physiol* 2005;99(5): 2008-19.  
17  
18  
19 <https://doi:10.1152/jappphysiol.00660.2005>  
20  
21
- 22 10. Rosique-Esteban N, Papandreou C, Romaguera D, *et al.* Cross-sectional associations of  
23  
24  
25 objectively-measured sleep characteristics with obesity and type 2 diabetes in the  
26  
27  
28 PREDIMED-Plus trial. *Sleep* 2018;41(12). <https://doi:10.1093/sleep/zsy190>  
29  
30
- 31 11. Inkster B, Riha RL, Van Look L, *et al.* Association between excessive daytime  
32  
33  
34 sleepiness and severe hypoglycemia in people with type 2 diabetes: the Edinburgh Type  
35  
36  
37 2 Diabetes Study. *DIABETES CARE* 2013;36:4157-9. <https://doi:10.2337/dc13-0863>  
38  
39
- 40 12. Bruyneel M, Kleynen P, Poppe K. Prevalence of undiagnosed glucose intolerance and  
41  
42  
43 type 2 diabetes in patients with moderate-to-severe obstructive sleep apnea syndrome.  
44  
45  
46 *Sleep Breath* 2019. <https://doi:10.1007/s11325-019-01989-y>  
47  
48
- 49 13. Modarresnia L, Golgiri F, Madani NH, *et al.* Restless Legs Syndrome in Iranian People  
50  
51  
52 With Type 2 Diabetes Mellitus: The Role in Quality of Life and Quality of Sleep. *J Clin*  
53  
54  
55 *Sleep Med* 2018;14(2):223-8. <https://doi:10.5664/jcsm.6938>  
56  
57  
58  
59  
60

- 1  
2  
3  
4 14. Chasens ER, Korytkowski M, Sereika SM, et al. Effect of poor sleep quality and  
5  
6  
7 excessive daytime sleepiness on factors associated with diabetes self-management.  
8  
9  
10 Diabetes Educ 2013;39(1):74-82. <https://doi:10.1177/0145721712467683>  
11  
12  
13 15. Oda A, Inagaki M, Tasaki K, et al. The Concept of Sleep Ability and its Effect on  
14  
15  
16 Diabetes Control in Adults With Type 2 Diabetes. *Can J Diabetes* 2019;43:329-35.  
17  
18  
19 <https://doi:10.1016/j.jcjd.2018.11.007>  
20  
21  
22 16. Hayes C, Kriska A. Role of physical activity in diabetes management and prevention. *J*  
23  
24  
25 *Am Diet Assoc* 2008;108(Suppl. 1): S19-23. <https://doi:10.1016/j.jada.2008.01.016>  
26  
27  
28 17. Zanuso S, Balducci S, Jimenez A. Physical activity, a key factor to quality of life in type  
29  
30  
31 2 diabetic patients. *Diabetes Metab Res Rev* 2009;25(Suppl. 1):S24-8.  
32  
33  
34 <https://doi:10.1002/dmrr.984>  
35  
36  
37 18. Tanaka H, Shirakawa S. Sleep health, lifestyle and mental health in the Japanese elderly:  
38  
39  
40 ensuring sleep to promote a healthy brain and mind. *J Psychosom Res* 2004;56(5):465-  
41  
42  
43 77. <https://doi:10.1016/j.jpsychores.2004.03.002>  
44  
45  
46 19. Waryasz GR, McDermott AY. Exercise prescription and the patient with type 2 diabetes:  
47  
48  
49 a clinical approach to optimizing patient outcomes. *J Am Acad Nurse Pract*  
50  
51  
52 2010;22(4):217-27. <https://doi:10.1111/j.1745-7599.2010.00490.x>  
53  
54  
55  
56  
57  
58  
59  
60

- 1  
2  
3  
4 20. Balducci S, Sacchetti M, Haxhi J, *et al.* Physical exercise as therapy for type 2 diabetes  
5  
6 mellitus. *Diabetes Metab Res Rev* 2014;30(Suppl. 1):13-23. [https://](https://doi:10.1002/dmrr.2514)  
7  
8  
9  
10 doi:10.1002/dmrr.2514  
11  
12  
13 21. Sivertsen B, Omvik S, Pallesen S, *et al.* Cognitive Behavioral Therapy vs Zopiclone for  
14  
15 Treatment of Chronic Primary Insomnia in Older Adults. A Randomized Controlled  
16  
17 Trial. *JAMA* 2006;295(24):2851-8. <https://doi:10.1001/jama.295.24.2851>  
18  
19  
20  
21  
22 22. Wickboldt AT, Bowen AF, Kaye AJ, *et al.* Sleep Physiology, Abnormal States, and  
23  
24 Therapeutic Interventions. *Ochsner J* 2012;12(2):122-34.  
25  
26  
27  
28 23. Khosravan S, Alami A, Golchin Rahni S. Effects of continuous care model based non-  
29  
30 pharmacological intervention on sleep quality in patients with type 2 diabetes mellitus: a  
31  
32 randomized controlled clinical trial. *Int J Community Based Nurs Midwifery* 2015;3(2):  
33  
34  
35  
36  
37 96-104.  
38  
39  
40 24. Buysse DJ, Reynolds CF3rd, Monk TH, *et al.* The Pittsburgh Sleep Quality Index: a new  
41  
42 instrument for psychiatric practice and research. *Psychiatry Res* 1989;28(2):193-213.  
43  
44  
45  
46  
47 [https://doi: 10.1016/0165-1781\(89\)90047-4](https://doi:10.1016/0165-1781(89)90047-4)  
48  
49  
50 25. Bastien CH, Vallières A, Morin CM. Validation of the Insomnia Severity Index as an  
51  
52 outcome measure for insomnia research. *Sleep Med*, 2001;2(4):297-307. [https://doi:](https://doi:10.1016/s1389-9457(00)00065-4)  
53  
54  
55  
56  
57  
58  
59  
60

- 1  
2  
3  
4 26. Johns MW. A new method for measuring daytime sleepiness: the Epworth sleepiness  
5  
6  
7 scale. *Sleep* 1991;14(6):540-545.  
8  
9
- 10 27. Nakajima H, Kaneita Y, Yokoyama E, *et al.* Association between sleep duration and  
11  
12  
13 hemoglobin A1c level. *Sleep Med* 2008;9(7):745-52.  
14  
15  
16 <https://doi:10.1016/j.sleep.2007.07.017>  
17  
18
- 19 28. The Japan Diabetes Society. Chronic complications. 2 Diabetic nephropathy. *Treatment*  
20  
21  
22 *guide for diabetes* 2020.  
23  
24
- 25 29. Kato S, Shimogaki H, Onodera A, *et al.* Development of the revised version of  
26  
27  
28 Hasegawa's Dementia Scale (HDS-R). *Japanese journal of geriatric psychiatry*  
29  
30  
31 1991;2(11):1339-47 (in Japanese).  
32  
33
- 34 30. Munezawa T, Morin CM, Inoue Y, *et al.* Development of the Japanese version of the  
35  
36  
37 Insomnia Severity Index (ISI-J). *Japan. Journal of Psychiatry Treatment* 2009;24:219–  
38  
39  
40 25 (in Japanese).  
41  
42
- 43 31. Doi Y, Minowa M, Uchiyama M, *et al.* Psychometric assessment of subjective sleep  
44  
45  
46 quality using the Japanese version of the Pittsburgh Sleep Quality Index (PSQI-J) in  
47  
48  
49 psychiatric disordered and control subjects. *Psychiatry Res*, 2000;97(2-3):165-72.  
50  
51  
52  
53  
54  
55  
56  
57  
58  
59  
60

- 1  
2  
3  
4 32. Takegami M, Suzukamo Y, Wakita T, *et al.* Development of a Japanese version of the  
5  
6  
7 Epworth Sleepiness Scale (JESS) based on item response theory. *Sleep Med*  
8  
9  
10 2009;10(5):556-65. <https://doi:10.1016/j.sleep.2008.04.015>  
11  
12  
13 33. Ikeda S, Shiraiwa T, Igarashi A, *et al.* Developing a Japanese version of the EQ-5D-5L  
14  
15  
16 value set. *Journal of the National Institute of Public Health* 2015;64(1): 47-55 (in  
17  
18  
19 Japanese).  
20  
21  
22 34. Sateia MJ. International Classification of Sleep Disorders-Third Edition: Highlights and  
23  
24  
25 Modifications. *Chest* 2014;146(5):1387-94. <https://doi:10.1378/chest.14-0970>  
26  
27  
28 35. Moriyma M, Nakano M, Kuroe Y, *et al.* Efficacy of a self-management education  
29  
30  
31 program for people with type 2 diabetes: Results of a 12 month trial. *Jpn J Nurs Sci*  
32  
33  
34 2009;6:51–63. <https://doi:10.1111/j.1742-7924.2009.00120.x>  
35  
36  
37 36. Kazawa K, Takeshita Y, Yorioka N, *et al.* Efficacy of a disease management program  
38  
39  
40 focused on acquisition of self-management skills in pre-dialysis patients with diabetic  
41  
42  
43 nephropathy: 24 months follow-up. *J Nephrol* 2015;329-38. [https://doi:10.1007/s40620-](https://doi:10.1007/s40620-014-0144-2)  
44  
45  
46 014-0144-2  
47  
48  
49 37. Kazawa K, Moriyama M. Effects of a Self-Management Skills-Acquisition Program on  
50  
51  
52 Pre-Dialysis Patients with Diabetic Nephropathy. *Nephrol Nurs J* 2013;141-8.  
53  
54  
55  
56  
57  
58  
59  
60

- 1  
2  
3  
4 38. Arosemena CM, Sánchez AJ, Tettamanti MD, *et al.* Excessive daytime somnolence is  
5  
6 associated with hypoglycemia in adult Latinos with type 2 diabetes mellitus. *Sleep Med*  
7  
8 2017;36:6-9. <https://doi:10.1016/j.sleep.2017.04.012>  
9  
10  
11  
12  
13 39. Otaka H, Murakami H, Nakayama H, *et al.* Association between insomnia and  
14  
15 personality traits among Japanese patients with type 2 diabetes mellitus. *J Diabetes*  
16  
17 *Investig* 2019;10(2):484-90. <https://doi:10.1111/jdi.12927>  
18  
19  
20  
21  
22 40. Gaede PL, Lund-Anderson H, Parving HH, *et al.* Effect of a multifactorial intervention  
23  
24 on mortality in type 2 diabetes. *N Engl J Med* 2008;358:580-91.  
25  
26  
27  
28 41. Perrin NE, Davies MJ, Robertson N, *et al.* The prevalence of diabetes-specific emotional  
29  
30 distress in people with Type 2 diabetes: a systematic review and meta-analysis. *Diabetic*  
31  
32 *Med* 2017;34(11):1508-20. <https://doi:10.1111/dme.13448>  
33  
34  
35  
36  
37 42. Perrin N, Bodicoat DH, Davies MJ, *et al.* Effectiveness of psychoeducational  
38  
39 interventions for the treatment of diabetes-specific emotional distress and glycaemic  
40  
41 control in people with type 2 diabetes: A systematic review and meta-analysis. *Prim*  
42  
43 *Care Diabetes* 2019;13(6):556-67. <https://doi:10.1016/j.pcd.2019.04.001>  
44  
45  
46  
47  
48 43. Isobe Y, Nakatsumi Y, Sugiyama Y, *et al.* Severity Indices for Obstructive Sleep Apnea  
49  
50 Syndrome Reflecting Glycemic Control or Insulin Resistance. *Intern Med* 2019;58(22):  
51  
52 3227-34. <https://doi:10.2169/internalmedicine.3005-19>  
53  
54  
55  
56  
57  
58  
59  
60

- 1  
2  
3  
4 44. Ha M, Chen J, Zhang X, *et al.* Relationships of social support, health-promoting  
5  
6 lifestyles, glycemic control, and bone turnover among adults with type 2 diabetes. *Jpn J*  
7  
8 *Nurs Sci* 2020;17(1):e12280. [https:// doi: 10.1111/jjns.12280](https://doi.org/10.1111/jjns.12280)  
9  
10  
11  
12  
13 45. Siegmann MJ, Athinarayanan SJ, Hallberg SJ, *et al.* Improvement in patient-reported  
14  
15 sleep in type 2 diabetes and prediabetes participants receiving a continuous care  
16  
17 intervention with nutritional ketosis. *Sleep Med* 2019;55: 92-9.  
18  
19  
20  
21  
22 [https://doi:10.1016/j.sleep.2018.12.014](https://doi.org/10.1016/j.sleep.2018.12.014)  
23  
24  
25  
26  
27  
28  
29  
30

31 Figure 1. Framework of the intervention program  
32

33  
34  
35  
36  
37 Figure 2. Flow diagram of the participants  
38  
39  
40  
41  
42

43 Figure 3. Changes in self-management behaviors  
44  
45  
46  
47  
48

49 Figure 4. Relationship between the sleep status and exercise frequency  
50  
51  
52  
53  
54

55 Table 1. Assessment results of the participants' sleep  
56  
57  
58  
59  
60

n = 24

| Number of people with sleep disorders<br>n (%) | Applicable to sleep disorder on other scales |           |           |             | Not applicable to sleep disorders on any other scales | Total number |
|------------------------------------------------|----------------------------------------------|-----------|-----------|-------------|-------------------------------------------------------|--------------|
|                                                | ISI                                          | PSQI      | ESS       | Sleep meter |                                                       |              |
| ISI<br>( 8 points ≤ )                          |                                              | 6 (75.0%) | 2 (25.0%) | 8 (100.0%)  | 0 (0.0%)                                              | 8 (100.0%)   |
| PSQI<br>( 6 points ≤ )                         | 6 (66.7%)                                    |           | 1 (11.1%) | 7 (77.8%)   | 2 (22.2%)                                             | 9 (100.0%)   |
| ESS<br>( 11 points ≤ )                         | 2 (100.0%)                                   | 1 (50.0%) |           | 2 (100.0%)  | 0 (0.0%)                                              | 2 (100.0%)   |
| Sleep meter<br>( ≤ 2 points )                  | 8 (61.5%)                                    | 7 (53.8%) | 2 (15.4%) |             | 4 (30.8%)                                             | 13 (100.0%)  |

Note; ISI = Insomnia Severity Index, PSQI = Pittsburg Sleep Quality Index, ESS = The Epworth Sleepiness Scale

Of the 26 who agreed to participate in the study, two could not be evaluated for sleep because they declined immediately after consent.

Table 2. Changes in outcomes

|                                     |    | Mean ± SD    |              |                 |                 |       |   |
|-------------------------------------|----|--------------|--------------|-----------------|-----------------|-------|---|
|                                     | n  | Baseline     | 3rd month    | 6th month       | p-value         |       |   |
| Physiological indicators            |    |              |              |                 |                 |       |   |
| - BMI                               | 24 | 25.3 ± 5.2   | 24.7 ± 5.2   | 24.2 ± 5.1      | <0.001          | a     |   |
| - SBP (mmHg)                        | 20 | 138.4 ± 14.1 | 129.3 ± 15.5 | 125.8 ± 15.4    | 0.009           | b     |   |
| - DBP (mmHg)                        | 20 | 75.8 ± 11.8  | 70.4 ± 8.1   | 73.2 ± 11.9     | 0.156           | b     |   |
| - eGFR (ml/min/1.73m <sup>2</sup> ) | 24 | 65.7 ± 18.4  | -            | 63 ± 13.1       | 0.886           | c     |   |
| - Triglyceride (mg/dl)              | 23 | 174.0 ± 110  | -            | 165.2 ± 78.5    | 0.976           | c     |   |
| - non HDL-c (mg/dl)                 | 23 | 138.8 ± 35.3 | -            | 122.3 ± 30.5    | 0.017           | d     |   |
| - HbA1c (%)                         | 24 | 8.0 ± 1.2    | 7.4 ± 1.1    | 7.0 ± 0.9       | <0.001          | a     |   |
| Number of steps per day             | 20 | 7762.8       | 2831.9       | 7597.4 ± 3509.1 | 7247.8 ± 3331.5 | 0.271 | b |
| QOL                                 |    |              |              |                 |                 |       |   |
| - Euro QOL-5D-5L (score)            | 24 | 0.86 ± 0.11  | -            | 0.89 ± 0.12     | 0.031           | d     |   |
| - Subjective health status (%)      | 24 | 75.1 ± 16.8  | -            | 80.9 ± 14.5     | 0.016           | d     |   |
| Quality of sleep                    |    |              |              |                 |                 |       |   |
| - ISI (score)                       | 24 | 6.4 ± 4.2    | -            | 6.4 ± 4.8       | 1.000           | d     |   |
| - PSQI (score)                      | 24 | 4.9 ± 2.7    | -            | 5.5 ± 3.4       | 0.207           | d     |   |



1  
2  
3  
4  
5  
6  
7  
8  
9  
10  
11  
12  
13  
14  
15  
16  
17  
18  
19  
20  
21  
22  
23  
24  
25  
26  
27  
28  
29  
30  
31  
32  
33  
34  
35  
36  
37  
38  
39  
40  
41  
42  
43  
44  
45  
46  
47  
48  
49  
50  
51  
52  
53  
54  
55  
56  
57  
58  
59  
60

|               |    |           |   |           |                    |
|---------------|----|-----------|---|-----------|--------------------|
| - ESS (score) | 23 | 4.7 ± 3.2 | - | 4.5 ± 3.2 | 0.739 <sup>d</sup> |
|---------------|----|-----------|---|-----------|--------------------|

Note: a: Friedman test, b: ANOVA, c: Wilcoxon signed-rank test, d: t test

BMI = Body mass index, SBP = Systolic blood pressure, DBP = Diastolic blood pressure, eGFR = estimated glomerular filtration rate, non HDL-c = non HDL-cholesterol, QOL = Quality of life, ISI = Insomnia Severity Index, PSQI = Pittsburg Sleep Quality Index, ESS = The Epworth Sleepiness Scale

For peer review only

Table 3. Comparison of outcomes in groups with and without sleep disorders

|                                     | Sleep disorders (n=15) |                 |                 |                     | Without sleep disorders (n=9) |                 |                 |                     | Mean ± SD          |
|-------------------------------------|------------------------|-----------------|-----------------|---------------------|-------------------------------|-----------------|-----------------|---------------------|--------------------|
|                                     | n                      | Baseline        | 6th month       | Changes in 6 months | n                             | Baseline        | 6th month       | Changes in 6 months | p-value            |
| Age                                 | 15                     | 64.4 ± 6.8      |                 |                     | 9                             | 67.8 ± 4.7      |                 |                     | 0.203 <sup>a</sup> |
| Physiological indicators            |                        |                 |                 |                     |                               |                 |                 |                     |                    |
| - BMI                               | 15                     | 26.3 ± 6.2      | 25.2 ± 6.0      | -1.1 ± 1.2          | 9                             | 23.7 ± 2.3      | 22.5 ± 2.5      | -1.1 ± 0.7          | 0.910 <sup>b</sup> |
| - SBP (mmHg)                        | 12                     | 140.0 ± 10.4    | 126.7 ± 14.2    | -13.3 ± 15.5        | 8                             | 136.0 ± 19.0    | 124.4 ± 18.1    | -11.6 ± 18.5        | 0.826 <sup>a</sup> |
| - DBP (mmHg)                        | 12                     | 78.4 ± 14.0     | 75.8 ± 12.0     | -2.6 ± 15.1         | 8                             | 71.9 ± 6.5      | 69.1 ± 11.2     | -2.8 ± 8.2          | 0.978 <sup>a</sup> |
| - eGFR (ml/min/1.73m <sup>2</sup> ) | 15                     | 64.5 ± 22.5     | 60.2 ± 15.6     | -4.3 ± 11.9         | 9                             | 67.6 ± 9.3      | 67.6 ± 5.6      | 0.0 ± 9.0           | 0.329 <sup>b</sup> |
| - Triglyceride (mg/dl)              | 14                     | 191.6 ± 121.7   | 191.6 ± 77.1    | 0.1 ± 78.8          | 9                             | 148.3 ± 88.7    | 124.1 ± 64.5    | -24.2 ± 88.5        | 0.512 <sup>b</sup> |
| - non HDL-c (mg/dl)                 | 14                     | 146.9 ± 41.1    | 128.5 ± 30.3    | -28.2 ± 49.4        | 9                             | 126.0 ± 19.6    | 112.6 ± 30.0    | -13.4 ± 19.3        | 0.400 <sup>b</sup> |
| - HbA1c (%)                         | 15                     | 8.0 ± 1.0       | 7.0 ± 1.0       | -0.9 ± 1.0          | 9                             | 8.0 ± 1.4       | 6.8 ± 0.5       | -1.2 ± 1.1          | 0.587 <sup>b</sup> |
| QOL                                 |                        |                 |                 |                     |                               |                 |                 |                     |                    |
| - Euro QOL-5D-5L (score)            | 15                     | 0.83 ± 0.12     | 0.86 ± 0.12     | 0.03 ± 0.70         | 9                             | 0.90 ± 0.09     | 0.94 ± 0.11     | 0.04 ± 0.072        | 0.565 <sup>a</sup> |
| - Subjective health status (%)      | 15                     | 69.9 ± 17.2     | 78.5 ± 15.8     | 8.7 ± 12.0          | 9                             | 83.9 ± 12.4     | 84.8 ± 12.0     | 0.9 ± 6.9           | 0.090 <sup>a</sup> |
| Number of steps per day             | 11                     | 6819.7 ± 2399.0 | 6087.9 ± 2464.5 | -731.8 ± 1027.2     | 9                             | 8915.3 ± 3022.5 | 8665.3 ± 3828.5 | -250.0 ± 2382.7     | 0.551 <sup>a</sup> |
| Quality of sleep                    |                        |                 |                 |                     |                               |                 |                 |                     |                    |
| - ISI (score)                       | 15                     | 8.4 ± 3.8       | 8.5 ± 4.5       | 0.13 ± 4.4          | 9                             | 3.1 ± 2.2       | 2.9 ± 2.5       | -0.2 ± 1.9          | 0.822 <sup>a</sup> |
| - PSQI (score)                      | 15                     | 6.2 ± 2.2       | 7.1 ± 3.4       | 0.9 ± 2.9           | 9                             | 2.7 ± 1.9       | 2.9 ± 2.1       | 0.2 ± 1.7           | 0.514 <sup>a</sup> |
| - ESS (score)                       | 15                     | 5.2 ± 3.5       | 4.5 ± 3.7       | -0.7 ± 3.3          | 8                             | 3.8 ± 2.2       | 4.5 ± 2.1       | 1.3 ± 3.0           | 0.138 <sup>a</sup> |

1  
2  
3 Note: a: t test, b: Mann-Whitney U test.  
4

5 There were no significant differences between the baselines of the two groups.

6 BMI = Body mass index, SBP = Systolic blood pressure, DBP = Diastolic blood pressure, eGFR = estimated glomerular filtration rate, non HDL-c = non HDL-cholesterol,  
7

8 QOL = Quality of health, ISI = Insomnia Severity Index, PSQI = Pittsburg Sleep Quality Index, ESS = The Epworth Sleepiness Scale  
9  
10  
11  
12  
13  
14  
15  
16  
17  
18  
19  
20  
21  
22  
23  
24  
25  
26  
27  
28  
29  
30  
31  
32  
33  
34  
35  
36  
37  
38  
39  
40  
41  
42  
43  
44  
45  
46

For peer review only

Supplemental 1. Textbook for Sleep education used in this study: contents

For peer review only

1  
2  
3  
4  
5  
6  
7  
8  
9  
10  
11  
12  
13  
14  
15  
16  
17  
18  
19  
20  
21  
22  
23  
24  
25  
26  
27  
28  
29  
30  
31  
32  
33  
34  
35  
36  
37  
38  
39  
40  
41  
42  
43  
44  
45  
46  
47  
48  
49  
50  
51  
52  
53  
54  
55  
56  
57  
58  
59  
60

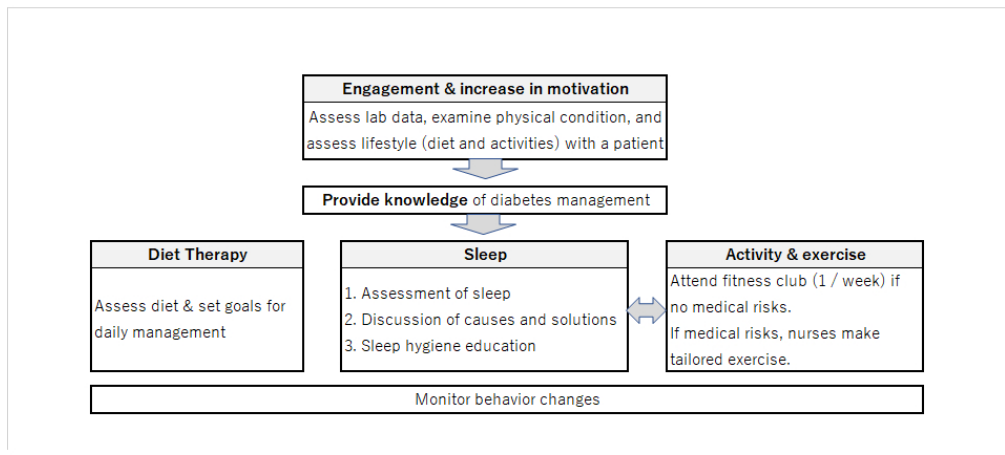

Figure 1

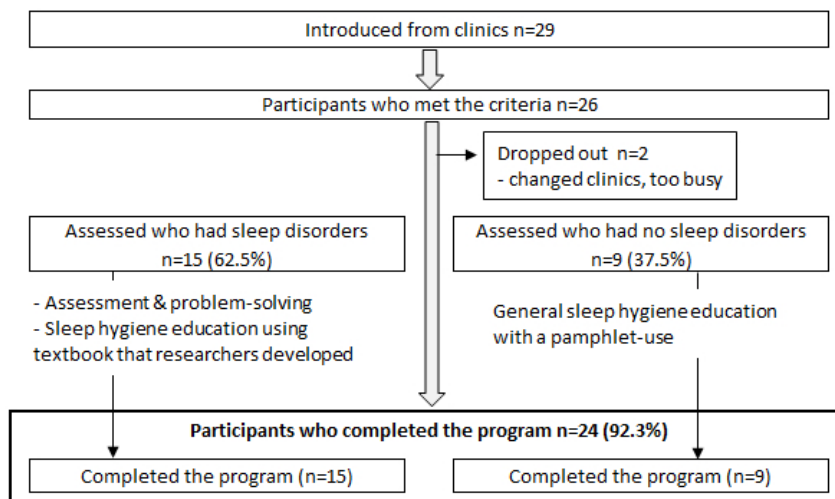

Figure 2

1  
2  
3  
4  
5  
6  
7  
8  
9  
10  
11  
12  
13  
14  
15  
16  
17  
18  
19  
20  
21  
22  
23  
24  
25  
26  
27  
28  
29  
30  
31  
32  
33  
34  
35  
36  
37  
38  
39  
40  
41  
42  
43  
44  
45  
46  
47  
48  
49  
50  
51  
52  
53  
54  
55  
56  
57  
58  
59  
60

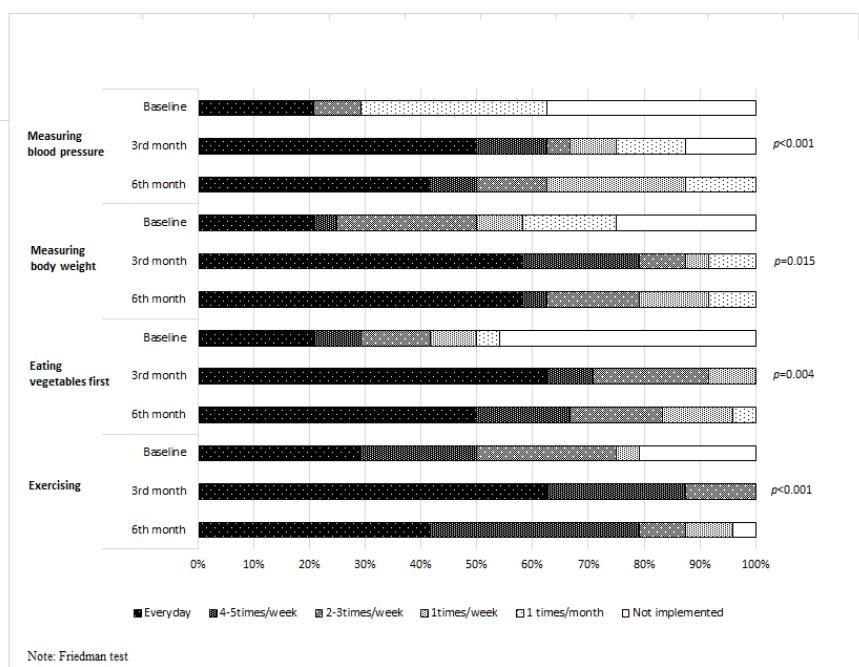

Figure 3

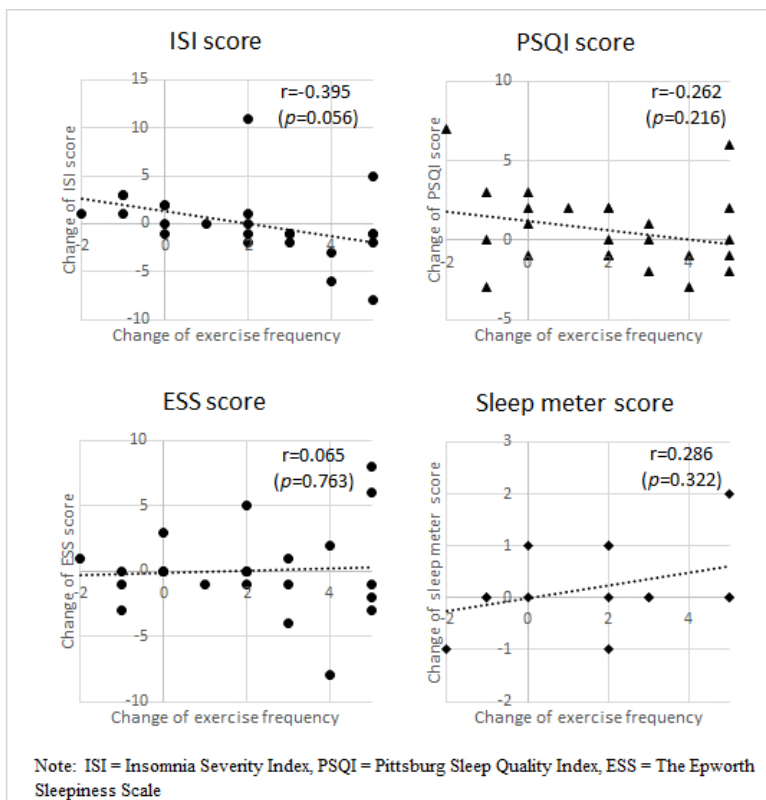

Figure 4



## 目 次

|                                             |     |
|---------------------------------------------|-----|
| <b>■ 睡眠障害を起こす原因を探りましょう（心理・社会編）</b>          |     |
| 睡眠障害を起こす原因を探りましょう(心理・社会編).....              | 1-3 |
| 睡眠障害の前兆（原因・要因）に対して、<br>適切な対処を行うことが大切です..... | 4   |
| .....                                       |     |
| .....                                       |     |
| <b>■ 睡眠障害の基礎知識</b>                          |     |
| 睡眠障害の分類 .....                               | 5   |
| 睡眠と生活の質.....                                | 6   |
| 睡眠と生活習慣病 .....                              | 7   |
| あなたの睡眠に問題があるか、チェックしましょう（身体編） .....          | 9   |
| 糖尿病と閉塞性睡眠時無呼吸症候群 .....                      | 10  |
| パルスオキシメーターでわかること .....                      | 11  |
| 活動量と睡眠の関係.....                              | 12  |
| 睡眠の量と質を客観的に評価してみよう.....                     | 13  |
| .....                                       |     |
| .....                                       |     |
| <b>■ 専門治療で改善する睡眠障害</b>                      |     |
| 閉塞性睡眠時無呼吸症候群について .....                      | 14  |
| 閉塞性睡眠時無呼吸の治療 .....                          | 15  |
| むずむず脚症候群と周期性四肢運動障害について .....                | 16  |
| .....                                       |     |
| .....                                       |     |
| <b>■ よりよい睡眠のために</b>                         |     |
| 体内時計と社会の時計がずれてしまう？.....                     | 17  |
| 睡眠障害が起こっている原因を見つけましょう（体内時計編） .....          | 18  |
| 体内時計の合わせ方 理想的な睡眠とは .....                    | 19  |
| 理想的な睡眠を得るには.....                            | 20  |
| よい睡眠は、よい血糖コントロールにつながります.....                | 21  |
| よりよい睡眠のための 12 か条.....                       | 22  |

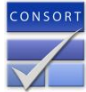

## CONSORT 2010 checklist of information to include when reporting a randomised trial\*

| Section/Topic             | Item No | Checklist item                                                                                                                                                                              | Reported on page No                                                       |
|---------------------------|---------|---------------------------------------------------------------------------------------------------------------------------------------------------------------------------------------------|---------------------------------------------------------------------------|
| <b>Title and abstract</b> |         |                                                                                                                                                                                             |                                                                           |
|                           | 1a      | Identification as a randomised trial in the title                                                                                                                                           | This study is not a randomised trial. We stated the study design.<br>pp.1 |
|                           | 1b      | Structured summary of trial design, methods, results, and conclusions (for specific guidance see CONSORT for abstracts)                                                                     | pp.1-2                                                                    |
| <b>Introduction</b>       |         |                                                                                                                                                                                             |                                                                           |
| Background and objectives | 2a      | Scientific background and explanation of rationale                                                                                                                                          | pp.3-6                                                                    |
|                           | 2b      | Specific objectives or hypotheses                                                                                                                                                           | pp.6                                                                      |
| <b>Methods</b>            |         |                                                                                                                                                                                             |                                                                           |
| Trial design              | 3a      | Description of trial design (such as parallel, factorial) including allocation ratio                                                                                                        | pp.7                                                                      |
|                           | 3b      | Important changes to methods after trial commencement (such as eligibility criteria), with reasons                                                                                          | pp.7-8                                                                    |
| Participants              | 4a      | Eligibility criteria for participants                                                                                                                                                       | pp.7-8                                                                    |
|                           | 4b      | Settings and locations where the data were collected                                                                                                                                        | pp.10                                                                     |
| Interventions             | 5       | The interventions for each group with sufficient details to allow replication, including how and when they were actually administered                                                       | pp.11-13                                                                  |
| Outcomes                  | 6a      | Completely defined pre-specified primary and secondary outcome measures, including how and when they were assessed                                                                          | pp.8-10                                                                   |
|                           | 6b      | Any changes to trial outcomes after the trial commenced, with reasons                                                                                                                       | -                                                                         |
| Sample size               | 7a      | How sample size was determined                                                                                                                                                              | pp.8                                                                      |
|                           | 7b      | When applicable, explanation of any interim analyses and stopping guidelines                                                                                                                | -                                                                         |
| <b>Randomisation:</b>     |         |                                                                                                                                                                                             |                                                                           |
| Sequence generation       | 8a      | Method used to generate the random allocation sequence                                                                                                                                      | -                                                                         |
|                           | 8b      | Type of randomisation; details of any restriction (such as blocking and block size)                                                                                                         | -                                                                         |
| Allocation concealment    | 9       | Mechanism used to implement the random allocation sequence (such as sequentially numbered containers), describing any steps taken to conceal the sequence until interventions were assigned | -                                                                         |

|    |                                                      |     |                                                                                                                                                   |          |
|----|------------------------------------------------------|-----|---------------------------------------------------------------------------------------------------------------------------------------------------|----------|
| 1  | mechanism                                            |     |                                                                                                                                                   |          |
| 2  | Implementation                                       | 10  | Who generated the random allocation sequence, who enrolled participants, and who assigned participants to interventions                           | -        |
| 3  |                                                      |     |                                                                                                                                                   |          |
| 4  | Blinding                                             | 11a | If done, who was blinded after assignment to interventions (for example, participants, care providers, those assessing outcomes) and how          | -        |
| 5  |                                                      |     |                                                                                                                                                   |          |
| 6  |                                                      | 11b | If relevant, description of the similarity of interventions                                                                                       | -        |
| 7  |                                                      |     |                                                                                                                                                   |          |
| 8  | Statistical methods                                  | 12a | Statistical methods used to compare groups for primary and secondary outcomes                                                                     | pp.13    |
| 9  |                                                      | 12b | Methods for additional analyses, such as subgroup analyses and adjusted analyses                                                                  | -        |
| 10 |                                                      |     |                                                                                                                                                   |          |
| 11 | <b>Results</b>                                       |     |                                                                                                                                                   |          |
| 12 | Participant flow (a diagram is strongly recommended) | 13a | For each group, the numbers of participants who were randomly assigned, received intended treatment, and were analysed for the primary outcome    | pp.14    |
| 13 |                                                      | 13b | For each group, losses and exclusions after randomisation, together with reasons                                                                  | pp.14    |
| 14 |                                                      |     |                                                                                                                                                   |          |
| 15 | Recruitment                                          | 14a | Dates defining the periods of recruitment and follow-up                                                                                           | pp.8     |
| 16 |                                                      | 14b | Why the trial ended or was stopped                                                                                                                | pp.8     |
| 17 |                                                      |     |                                                                                                                                                   |          |
| 18 | Baseline data                                        | 15  | A table showing baseline demographic and clinical characteristics for each group                                                                  | pp.14-15 |
| 19 | Numbers analysed                                     | 16  | For each group, number of participants (denominator) included in each analysis and whether the analysis was by original assigned groups           | pp.14-15 |
| 20 |                                                      |     |                                                                                                                                                   |          |
| 21 | Outcomes and estimation                              | 17a | For each primary and secondary outcome, results for each group, and the estimated effect size and its precision (such as 95% confidence interval) | pp.15-17 |
| 22 |                                                      | 17b | For binary outcomes, presentation of both absolute and relative effect sizes is recommended                                                       | -        |
| 23 |                                                      |     |                                                                                                                                                   |          |
| 24 | Ancillary analyses                                   | 18  | Results of any other analyses performed, including subgroup analyses and adjusted analyses, distinguishing pre-specified from exploratory         | -        |
| 25 |                                                      |     |                                                                                                                                                   |          |
| 26 | Harms                                                | 19  | All important harms or unintended effects in each group (for specific guidance see CONSORT for harms)                                             | -        |
| 27 |                                                      |     |                                                                                                                                                   |          |
| 28 | <b>Discussion</b>                                    |     |                                                                                                                                                   |          |
| 29 | Limitations                                          | 20  | Trial limitations, addressing sources of potential bias, imprecision, and, if relevant, multiplicity of analyses                                  | pp.22-23 |
| 30 | Generalisability                                     | 21  | Generalisability (external validity, applicability) of the trial findings                                                                         | pp.18-22 |
| 31 | Interpretation                                       | 22  | Interpretation consistent with results, balancing benefits and harms, and considering other relevant evidence                                     | pp.18-22 |
| 32 |                                                      |     |                                                                                                                                                   |          |
| 33 | <b>Other information</b>                             |     |                                                                                                                                                   |          |
| 34 | Registration                                         | 23  | Registration number and name of trial registry                                                                                                    | pp.13-14 |
| 35 | Protocol                                             | 24  | Where the full trial protocol can be accessed, if available                                                                                       | -        |
| 36 | Funding                                              | 25  | Sources of funding and other support (such as supply of drugs), role of funders                                                                   | pp.13    |
| 37 |                                                      |     |                                                                                                                                                   |          |
| 38 |                                                      |     |                                                                                                                                                   |          |
| 39 |                                                      |     |                                                                                                                                                   |          |
| 40 |                                                      |     |                                                                                                                                                   |          |
| 41 |                                                      |     |                                                                                                                                                   |          |
| 42 |                                                      |     |                                                                                                                                                   |          |

1 \*We strongly recommend reading this statement in conjunction with the CONSORT 2010 Explanation and Elaboration for important clarifications on all the items. If relevant, we also  
2 recommend reading CONSORT extensions for cluster randomised trials, non-inferiority and equivalence trials, non-pharmacological treatments, herbal interventions, and pragmatic trials.  
3 Additional extensions are forthcoming: for those and for up to date references relevant to this checklist, see [www.consort-statement.org](http://www.consort-statement.org).  
4  
5  
6  
7  
8  
9  
10  
11  
12  
13  
14  
15  
16  
17  
18  
19  
20  
21  
22  
23  
24  
25  
26  
27  
28  
29  
30  
31  
32  
33  
34  
35  
36  
37  
38  
39  
40  
41  
42

For peer review only

# BMJ Open

## Can a sleep disorder intervention embedded self-management program contribute to improve management of diabetes? A pilot single-arm pre-and post-test study

|                                 |                                                                                                                                                                                                                                                                                                                                                                                                                                                                                                                                                                                                                                                                                                                                                                                                                                                                                                                      |
|---------------------------------|----------------------------------------------------------------------------------------------------------------------------------------------------------------------------------------------------------------------------------------------------------------------------------------------------------------------------------------------------------------------------------------------------------------------------------------------------------------------------------------------------------------------------------------------------------------------------------------------------------------------------------------------------------------------------------------------------------------------------------------------------------------------------------------------------------------------------------------------------------------------------------------------------------------------|
| Journal:                        | <i>BMJ Open</i>                                                                                                                                                                                                                                                                                                                                                                                                                                                                                                                                                                                                                                                                                                                                                                                                                                                                                                      |
| Manuscript ID                   | bmjopen-2020-045783.R1                                                                                                                                                                                                                                                                                                                                                                                                                                                                                                                                                                                                                                                                                                                                                                                                                                                                                               |
| Article Type:                   | Original research                                                                                                                                                                                                                                                                                                                                                                                                                                                                                                                                                                                                                                                                                                                                                                                                                                                                                                    |
| Date Submitted by the Author:   | 13-May-2021                                                                                                                                                                                                                                                                                                                                                                                                                                                                                                                                                                                                                                                                                                                                                                                                                                                                                                          |
| Complete List of Authors:       | Sakamoto, Ritsuko; Hiroshima University, Chronic Care and Family Nursing, Division of Nursing Science, Graduate School of Biomedical and Health Sciences<br>Kazawa, Kana; Hiroshima Daigaku Daigakuin Ikei Kagaku Kenkyuka, Department of Medicine for Integrated Approach to Social Inclusion, Graduate School of Biomedical and Health Sciences<br>Jahan, Yasmin; Hiroshima Daigaku Daigakuin Ikei Kagaku Kenkyuka, Chronic Care and Family Nursing, Division of Nursing Science, Graduate School of Biomedical and Health Sciences<br>Takeyama, Naoko; Hiroshima Daigaku Daigakuin Ikei Kagaku Kenkyuka, Chronic Care and Family Nursing, Division of Nursing Science, Graduate School of Biomedical and Health Sciences<br>Moriyama, Michiko ; Hiroshima Daigaku Daigakuin Ikei Kagaku Kenkyuka, Chronic Care and Family Nursing, Division of Nursing Science, Graduate School of Biomedical and Health Sciences |
| <b>Primary Subject Heading</b>: | Nursing                                                                                                                                                                                                                                                                                                                                                                                                                                                                                                                                                                                                                                                                                                                                                                                                                                                                                                              |
| Secondary Subject Heading:      | Public health                                                                                                                                                                                                                                                                                                                                                                                                                                                                                                                                                                                                                                                                                                                                                                                                                                                                                                        |
| Keywords:                       | General diabetes < DIABETES & ENDOCRINOLOGY, SLEEP MEDICINE, Change management < HEALTH SERVICES ADMINISTRATION & MANAGEMENT, EDUCATION & TRAINING (see Medical Education & Training)                                                                                                                                                                                                                                                                                                                                                                                                                                                                                                                                                                                                                                                                                                                                |
|                                 |                                                                                                                                                                                                                                                                                                                                                                                                                                                                                                                                                                                                                                                                                                                                                                                                                                                                                                                      |

SCHOLARONE™  
Manuscripts



I, the Submitting Author has the right to grant and does grant on behalf of all authors of the Work (as defined in the below author licence), an exclusive licence and/or a non-exclusive licence for contributions from authors who are: i) UK Crown employees; ii) where BMJ has agreed a CC-BY licence shall apply, and/or iii) in accordance with the terms applicable for US Federal Government officers or employees acting as part of their official duties; on a worldwide, perpetual, irrevocable, royalty-free basis to BMJ Publishing Group Ltd ("BMJ") its licensees and where the relevant Journal is co-owned by BMJ to the co-owners of the Journal, to publish the Work in this journal and any other BMJ products and to exploit all rights, as set out in our [licence](#).

The Submitting Author accepts and understands that any supply made under these terms is made by BMJ to the Submitting Author unless you are acting as an employee on behalf of your employer or a postgraduate student of an affiliated institution which is paying any applicable article publishing charge ("APC") for Open Access articles. Where the Submitting Author wishes to make the Work available on an Open Access basis (and intends to pay the relevant APC), the terms of reuse of such Open Access shall be governed by a Creative Commons licence – details of these licences and which [Creative Commons](#) licence will apply to this Work are set out in our licence referred to above.

Other than as permitted in any relevant BMJ Author's Self Archiving Policies, I confirm this Work has not been accepted for publication elsewhere, is not being considered for publication elsewhere and does not duplicate material already published. I confirm all authors consent to publication of this Work and authorise the granting of this licence.

1  
2  
3  
4 **Title: Can a sleep disorder intervention embedded self-management program**  
5  
6 **contribute to improve management of diabetes? A pilot single-arm pre-and post-test**  
7  
8 **study**  
9

10  
11  
12 **AUTHORS**  
13

14  
15  
16 Ritsuko Sakamoto, RN, MSN<sup>1)</sup>, Kana Kazawa RN, PHN, Ph.D<sup>2)</sup>, Yasmin Jahan, MBBS,  
17  
18 MPH, Ph.D<sup>1)</sup>, Naoko Takeyama RN, MSN, Ph.D<sup>1)</sup>, Michiko Moriyama RN, Ph.D<sup>1)</sup>  
19  
20  
21

22  
23 **Ritsuko Sakamoto, RN, MSN, CNS**

24 <sup>1)</sup> Chronic Care and Family Nursing, Division of Nursing Science, Graduate School of  
25 Biomedical and Health Sciences, Hiroshima University  
26  
27 Email: ribbonsaku@yahoo.co.jp  
28

29 **Kana Kazawa, RN, PHN, MSN, CNS, Ph.D.**

30 <sup>2)</sup> Department of Medicine for Integrated Approach to Social Inclusion, Graduate School of  
31 Biomedical and Health Sciences, Hiroshima University.  
32  
33 Email: kkazawa@hiroshima-u.ac.jp  
34

35 **Yasmin Jahan, MBBS, MPH, Ph.D**

36 <sup>1)</sup> Chronic Care and Family Nursing, Division of Nursing Science, Graduate School of  
37 Biomedical and Health Sciences, Hiroshima University  
38  
39 Email: dr.yasminjahan@gmail.com  
40

41 **Naoko Takeyama RN, PHN, MSN, Ph.D**

42 <sup>1)</sup> Chronic Care and Family Nursing, Division of Nursing Science, Graduate School of  
43 Biomedical and Health Sciences, Hiroshima University  
44  
45 Email: naoko.tkym@gmail.com  
46

47 **Michiko Moriyama RN, Ph.D**

48 <sup>1)</sup> Chronic Care and Family Nursing, Division of Nursing Science, Graduate School of  
49 Biomedical and Health Sciences, Hiroshima University  
50  
51 Email: morimich@hiroshima-u.ac.jp  
52

53  
54 **CORRESPONDENCE TO:** Kana Kazawa, RN, MSN, Ph.D.

55  
56 Department of Medicine for Integrated Approach to Social Inclusion, Graduate School of  
57 Biomedical and Health Sciences, Hiroshima University. Kasumi 1-2-3 Minami-ku,  
58  
59  
60

1  
2  
3  
4  
5  
6  
7  
8  
9  
10  
11  
12  
13  
14  
15  
16  
17  
18  
19  
20  
21  
22  
23  
24  
25  
26  
27  
28  
29  
30  
31  
32  
33  
34  
35  
36  
37  
38  
39  
40  
41  
42  
43  
44  
45  
46  
47  
48  
49  
50  
51  
52  
53  
54  
55  
56  
57  
58  
59  
60

Hiroshima, 734-8553 Japan, TEL & FAX +81-82-257-2018, e-mail: [kkazawa@hiroshima-u.ac.jp](mailto:kkazawa@hiroshima-u.ac.jp)

For peer review only



## ABSTRACT

**Objective:** To investigate the efficacy and feasibility of a self-management programme incorporating a sleep intervention for improving diabetes outcomes.

**Design:** A single-arm pre-and post-test study was conducted within a community setting in Hiroshima, Japan.

**Participants:** Participants were aged 52-74 years and diagnosed with type 2 diabetic nephropathy stage 1 to 3.

**Interventions:** Participants received self-management education from nurses for six months. First, the nurses assessed their sleep conditions using insomnia scales and a sleep metre. Then, the participants learned self-management to increase their physical activity and improve their sleep condition. They also implemented diet therapy and medication adherence.

**Outcome measures:** Physiological indicators, subjective and objective indicators of sleep quality, self-management indicators, quality of life (QOL) and feasibility were evaluated. To confirm the efficacy of intervention, Freidman tests, analysis of variance, Wilcoxon signed rank test, and t-test were performed. Pearson's correlations were analysed between activities and sleep condition.

**Results:** Of the 26 enrolled participants, 24 completed the programme and were analysed. Among them, 15 participants (62.5%) had sleep disorders caused by multiple factors, such as an inappropriate lifestyle and physical factors that interferes with good sleep. Although

1  
2  
3  
4 insomnia scales did not change for the sleep-disorders, their subjective health status were  
5  
6  
7 improved. Regarding indicators related to diabetes management, lifestyles improved  
8  
9  
10 significantly. Hemoglobin A1c, body mass index, systolic blood pressure, non-HDL-  
11  
12  
13 cholesterol, and QOL also improved. All participants except one were satisfied with the  
14  
15  
16 programme. However, use of the sleep metre and nurses' consultation about sleep disturbance  
17  
18  
19 were not well evaluated.  
20

21  
22 **Conclusions:** This programme was effective in improving diabetes status, lifestyle, and  
23  
24  
25 behaviour changes. However, its effect on sleep condition was limited because of its  
26  
27  
28 complexity. A simple and novel approach is needed to strengthen the motivation for sleep  
29  
30  
31 behaviour change and to increase programme efficacy and feasibility.  
32

33  
34 **Registration:** UMIN000025906  
35

36  
37 **Keywords:** diabetes, sleep disorder, self-management  
38  
39  
40  
41  
42

### 43 **Strengths and limitations of this study**

- 44  
45  
46 ● To identify the potential sleep disorders, we used a sleep metre for objective assessment  
47  
48  
49 in addition to subjective sleep assessment measures.  
50
- 51  
52 ● We developed a comprehensive self-management programme incorporating a sleep  
53  
54  
55 intervention as sleep disorders have serious consequences for diabetes mellitus  
56  
57  
58 management.  
59  
60

- Our limitations relate to strong statistical power, as this project was a pilot study; a small sample size and a non-controlled study design was implemented.

## INTRODUCTION

The relationship between sleep disorders and impaired glucose tolerance (IGT) is receiving expanded consideration globally due to the negative health outcomes.<sup>1-3</sup> Previous studies have reported that sleep disorders may disturb glucose homeostasis in complex ways, such as by inducing excessive secretion of stress hormones, which in turn are emphatically related to obesity and type 2 diabetes mellitus (DM).<sup>4-5</sup> As DM and IGT are associated with a higher risk for developing cardiovascular disease and death, prevention and management of these health problems are important public health goals. Studies have shown that the prevalence of obstructive sleep apnoea (OSA) in diabetic patients is estimated to be 23-48%.<sup>6-7</sup> Patients with OSA and type 2 DM are at increased risk of diabetic peripheral neuropathy,<sup>8</sup> restless legs syndrome,<sup>9</sup> and frequent urination due to hyperglycaemia.<sup>10</sup> Furthermore, in patients with type 2 DM, the occurrence of OSA is associated with increased oxidative and nitrosative stress as well as impaired microvascular regulation.<sup>8</sup> Hence, it is plausible that OSA complicating type 2 DM could facilitate the development and progression of microvascular complications including diabetic nephropathy.

1  
2  
3  
4 Epidemiological studies have also found that sleep disturbances in diabetic patients to be  
5  
6  
7 correlated with not only glycaemic control but also lower self-care adherence and quality of  
8  
9  
10 life (QOL).<sup>11-12</sup> Therefore, we focused on sleep disorders as these are serious problems in  
11  
12  
13 patients with diabetes, including diabetic nephropathy and often need to be addressed by non-  
14  
15  
16 pharmacologic interventions as such sleep management.

17  
18  
19 Moreover, in DM management, exercise therapy has led to improvement in insulin resistance,  
20  
21  
22 advancement of glucose uptake by muscle contraction during exercise, enhancement of lipid  
23  
24  
25 abnormalities from the norm and cardiopulmonary function, and improvement of subjective  
26  
27  
28 well-being and self-esteem.<sup>13-14</sup> In this context, it can be anticipated that increasing physical  
29  
30  
31 activity may improve the sleep quality of diabetic patients.<sup>15-16</sup>

32  
33  
34 Regarding interventions for sleep disorders, several studies suggest that significant changes in  
35  
36  
37 sleep disorders of chronic primary insomnia are introduced by non-pharmacological  
38  
39  
40 approaches.<sup>17</sup> These approaches include interventions such as sleep hygiene education,  
41  
42  
43 relaxation, stress management, and cognitive therapy.<sup>17-18</sup> These interventions function as self-  
44  
45  
46 management education for patients with DM and may improve their lifestyle, subjective  
47  
48  
49 insomnia evaluation indices, and blood glucose levels.<sup>19</sup> However, few studies consider non-  
50  
51  
52 pharmacological treatments in patients with diabetes, including diabetic nephropathy, by  
53  
54  
55 screening for sleep disorders using both subjective and objective assessment as well as by  
56  
57  
58 analysing the factors that interfere with sleep.

1  
2  
3  
4 Nonetheless, few DM programmes include most appropriate improvement strategies,  
5  
6  
7 depending on the consequences of an assessment of the types and causes of sleep disorders. As  
8  
9  
10 yet, there are no reports discussing which of the multiple subjective and objective evaluation  
11  
12  
13 tools are most suitable for sleep disorders.

14  
15  
16 Therefore, this study, as a pilot, aims to evaluate the efficacy of a diabetes self-management  
17  
18  
19 programme incorporating sleep disorder assessment and education as well as the feasibility of  
20  
21  
22 the programme.

## 23 24 25 26 27 28 **METHODS**

### 29 30 31 **Study design**

32  
33  
34 This was a pilot, open-label, single-arm, pre-and post-design study conducted among  
35  
36  
37 outpatients with diabetic nephropathy at a community setting in Hiroshima Prefecture, Japan.

### 38 39 40 41 42 43 **Participants**

44  
45  
46 Participants were aged  $\geq 20$  and  $\leq 74$  years old and were diagnosed with type 2 DM, including  
47  
48  
49 diabetic nephropathy.

50  
51  
52 The inclusion criteria were as follows: 1) diabetic nephropathy stages 1 to 3 (estimated  
53  
54  
55 glomerular filtration rate; eGFR)  $\geq 30$  ml/min/1.73m<sup>2</sup>),<sup>20</sup> 2) undergoing treatment for DM on  
56  
57  
58 an outpatient basis, 3) insured by National Health Insurance living in Hiroshima City; Union  
59  
60

1  
2  
3  
4 National Health Insurance, the insurer of Japan Health Insurance Association, Hiroshima  
5  
6  
7 chapter; and the National Federation of Health Insurance Societies of Hiroshima living in  
8  
9  
10 Hiroshima Prefecture.

11  
12  
13 Patients were excluded if any of the following criteria presents: 1) presence of type 1 or  
14  
15  
16 secondary DM; 2) currently hospitalised; 3) undergoing renal replacement therapy or planning  
17  
18  
19 to begin renal replacement therapy within the next six months; 4) pregnant at the time of the  
20  
21  
22 study; 5) in terminal stages; 6) cognitively impaired (score  $\leq 20/30$  on the revised version of  
23  
24  
25 Hasegawa's dementia scale; HDS-R,<sup>21</sup> 7) judged by the nurses/primary physicians to be unable  
26  
27  
28 to implement any kind of activity required in this study, or 8) already registered in other clinical  
29  
30  
31 trials. Patients who were on any kind of sleep medication or psychotropic drugs were not  
32  
33  
34 excluded.

35  
36  
37 As this was an exploratory pilot study, sample size calculation was not performed.  
38  
39  
40  
41  
42

### 43 **Recruitment and registration**

44  
45  
46 Participants were introduced to the study by the primary physicians. They were checked for  
47  
48  
49 eligibility by the nurses, who obtained informed consent and registered the patients for this  
50  
51  
52 study between January to December 2017.  
53  
54  
55

### 56 **Evaluation of outcomes and data collection schedule**

57  
58  
59  
60

To evaluate the efficacy and feasibility of the programme incorporating sleep-disorder assessment and strengthening exercises, the following parameters were assessed:

- Physiological indicators: body mass index (BMI), systolic blood pressure (SBP), diastolic blood pressure (DBP), haemoglobin A1c (HbA1c), estimated glomerular filtration rate (eGFR), non-high-density lipoprotein-cholesterol (non-HDL-c), and triglycerides.
- Subjective measurement of sleep quality using the following: (1) the Insomnia Severity Index, Japanese version (ISI) to evaluate the severity of primary insomnia (cut-off point  $\geq 8$ );<sup>22</sup> (2) the Pittsburgh Sleep Quality Index, Japanese version (PSQI), to collect information on various domains of sleep including sleep latency, sleep length, sleep efficiency, sleep difficulty, use of sleeping pills, difficulty in waking during the day, and secondary insomnia such as OSAS (cut-off point  $\geq 6$ );<sup>23</sup> and (3) the Japanese version of Epworth Sleepiness Scale (JESS), to evaluate the excessive daytime sleepiness (cut-off point  $\geq 11$ ).<sup>24</sup>
- Objective measurement of sleep quality: A sensor mat type sleep metre (NEMURI SCAN NN-1310; Paramount bed Co., Ltd) was used to distinguish between sleep and wakefulness. Although the measured activity is different between whole body movements and wrist movements, this actigraphy device can measure sleep/wake states with almost the same accuracy as wrist actigraphy.<sup>25-26</sup> Moreover, this actigraphy device can be placed under the bed or mattress as well and can be easily used at home. This device records total sleep time, time in bed, sleep latency, sleep efficiency, wakefulness after sleep onset,

- 1  
2  
3  
4 number of out-of-bed instances, respiratory event index, periodic body movement index,  
5  
6  
7 activity score, respiratory rate, heart rate, sleep/wake log (graph showing sleep and wake  
8  
9  
10 patterns are color-coded). It then evaluates sleep on a scale from 1 to 4 (good), where 3  
11  
12  
13 implies 'no abnormality', 2 implies 'attention required', and 1 implies 'improvement  
14  
15  
16 required'. A score of 2 or less implies a possible sleep disorder (Supplemental file 1).  
17  
18  
19 - Self-management behaviour: The nurses asked the participants for the frequency of blood  
20  
21  
22 pressure (BP) and body weight self-monitoring, diet (prioritising vegetable consumption,  
23  
24  
25 etc.), and activity/exercise. The participant's activity/exercise level was measured as the  
26  
27  
28 total number of steps per day using a pedometer (Lifecorder GF, Suzuken Co., Ltd., Japan).  
29  
30  
31 - Health-related QOL: EuroQOL-5D-5L, Japanese version, was administered to evaluate the  
32  
33  
34 overall outcome of this programme.<sup>27</sup> This questionnaire evaluates five items (mobility,  
35  
36  
37 self-care, usual activities, pain/discomfort, and anxiety/depression), with each item  
38  
39  
40 evaluated on a scale of 1 to 5 (no problems, slight problems, moderate problems, severe  
41  
42  
43 problems, and extreme problems). For the subjective health status included in the EuroQOL  
44  
45  
46 tool, the participants make a self-assessment of their health on a scale from 0 (worst  
47  
48  
49 condition) to 100 (best condition). The EuroQOL-5D-5L was scored using tariffs.

51  
52 During the six-month intervention period, physiological and self-management indicators were  
53  
54  
55 collected every three months, while data regarding other variables were collected at baseline  
56  
57  
58 and at six months.  
59  
60



## Definition of sleep disorder

Sleep disorders include seven major categories in the International Classification of Sleep Disorders-Third Edition: insomnia, sleep-related breathing disorders, central disorders of hypersomnolence, circadian rhythm sleep-wake disorders, sleep-related movement disorders, parasomnias, and other sleep disorders.<sup>28</sup> In this study, we defined patients with sleep disorders as those having been diagnosed with a sleep disorder at a specialist clinic and/or those having awareness of their insomnia for more than one month and meeting at least one criteria (ISI  $\geq$  8 points, PSQI  $\geq$  6 points, JESS  $\geq$  11 points) on the sleep questionnaire or via the sleep metre's comprehensive judgment.

## Self-management intervention programme incorporating sleep improvement and activity/exercise enhancement

Figure 1 describes the framework of the intervention programme in this study. The programme was originally designed for patients to acquire skills for self-management of diabetic nephropathy.<sup>29</sup> The programme was implemented for six months and monitored via face-to-face and telephonic interviews.

After patient enrolment, the nurses performed a comprehensive assessment of laboratory test results; physical conditions; lifestyle practices such as diet, activities/exercise, drug adherence,

1  
2  
3  
4 alcohol, smoking, and psychosocial status of the participants; they also discussed the  
5  
6  
7 aggravating factors of DM. The nurses also explained the stage of diabetic nephropathy,  
8  
9  
10 treatment goals of the stage, and self-management using educational textbooks created by the  
11  
12  
13 authors of this study. The nurses and the participants jointly set the monthly goals and action  
14  
15  
16 plans for behavioural changes. The nurses educated the participants on various self-monitoring  
17  
18  
19 methods (measurement and evaluation of BP and body weight).<sup>30</sup>  
20  
21

22 With regard to increasing physical activity, the nurses introduced the participants to a fitness  
23  
24  
25 club if the participant did not have medical risks based on initial assessment by a primary  
26  
27  
28 physician. If a participant had medical risks for attending a fitness club or refused to attend, the  
29  
30  
31 nurses prescribed tailored exercises based on their physical tolerance and preference. For all  
32  
33  
34 participants, the nurses lent a pedometer and asked them to account for their activity for one  
35  
36  
37 week on baseline measurements. Visits to the fitness club were scheduled once a week during  
38  
39  
40 the first three months, with attendance being voluntary after this period. At the fitness club, a  
41  
42  
43 health fitness trainer held classes, approximately 60 minutes in duration, which involved  
44  
45  
46 walking, stretching, squatting, and gymnastics (exercise intensity was about 3 to 5 metabolic  
47  
48  
49 equivalents or METs).  
50

51  
52 Screening, evaluation, and intervention for sleep disorders: Three subjective assessment scales  
53  
54  
55 (ISI, PSQI, and JESS) were administered for screening and evaluating the participants'  
56  
57  
58 sleeping states. For those who were evaluated as having a sleep disorder on these scales and/or  
59  
60

1  
2  
3  
4 those who had a BMI of 30 or more (high chance to have sleep apnoea syndrome (SAS)), a  
5  
6  
7 sleep metre was lent to them by the nurses with usage instructions, and they were asked to use  
8  
9  
10 the device for one week. After the sleep metre was returned, the conditions of the participant's  
11  
12  
13 sleep disorders based on the subjective evaluation scale and the results of the sleep metre, were  
14  
15  
16 explained to them by the nurses. The nurses used a researcher-developed textbook in which the  
17  
18  
19 pathology, factors causing sleep disorders, and methods used to both deal with the problem as  
20  
21  
22 well as promote sleep hygiene was explained (Supplemental file 2). This textbook was  
23  
24  
25 developed based on a qualitative study.<sup>31</sup> The participants and the nurses then discussed how  
26  
27  
28 to solve the problem. The nurses contacted a specialist to evaluate those with moderate or  
29  
30  
31 higher levels of sleep disorders or suspected SAS. Those who were subjectively evaluated as  
32  
33  
34 not having any sleep disorders were also provided with prophylactic general sleep hygiene  
35  
36  
37 education using the textbook.

38  
39  
40 After the first session, the participants implemented the action plan and recorded their self-  
41  
42  
43 monitoring values in a notebook. The nurses evaluated the implementation of the action plan  
44  
45  
46 through face-to-face consultations (once every 2<sup>nd</sup> and 3<sup>rd</sup> month) and biweekly phone calls,  
47  
48  
49 proposing revisions to the implemented action plan when necessary.

## 55 **Data analysis**

56  
57  
58  
59  
60

1  
2  
3  
4 Statistical Package for Social Science software version 26.0 (Inc., Chicago, IL) was used for  
5  
6  
7 analysis. Normality was confirmed for each item, descriptive statistics were calculated, and  
8  
9  
10  
11  
12  
13  
14  
15  
16  
17  
18  
19  
20  
21  
22  
23  
24  
25  
26  
27  
28  
29  
30  
31  
32  
33  
34  
35  
36  
37  
38  
39  
40  
41  
42  
43  
44  
45  
46  
47  
48  
49  
50  
51  
52  
53  
54  
55  
56  
57  
58  
59  
60

Statistical Package for Social Science software version 26.0 (Inc., Chicago, IL) was used for analysis. Normality was confirmed for each item, descriptive statistics were calculated, and Friedman tests, analysis of variance (ANOVA), Wilcoxon signed rank test, and t-tests were performed (where appropriate) before and after the intervention. Pearson's correlations between activities and sleep condition were analysed. The significance level was set at 5%.

### **Patient and public involvement**

The educational textbook was developed based on patients' priorities and patients' experience by conducting qualitative research. As this is a self-management programme, patients were asked to report their data and progress to the researchers. Further, patients evaluated the feasibility of the programme. However, they were not directly involved in the design and conception of the study.

## **RESULTS**

### **Baseline characteristics of the participants**

Twenty-nine participants were introduced by five primary physicians, among them 26 met the eligibility criteria and were enrolled. Of the 26 patients, 17 were male (65.4%), and the mean age was  $65.7 \pm 6.0$  years. Two participants dropped out right after enrolment. Therefore, only 24 participants completed the six-month programme and were included in the analysis (Figure

1  
2  
3  
4 2). Of the 24 participants, 15 (62.5 %) were classified as having sleep disorders. Eleven  
5  
6 participants (45.8%) had sleep disorders based on any of the sleep questionnaires (ISI, PSQI,  
7  
8 JESS). Eight had an ISI score of 8 or greater, nine had a PSQI score of 6 or greater, and two  
9  
10 had a JESS score of 11 or greater. Moreover, 13 out of the 15 (86.7%) participants who agreed  
11  
12 to use a sleep metre had sleep disorders. However, four of them were not screened as having  
13  
14 sleep disorders based on the sleep questionnaire (i.e. those who were not aware that their sleep  
15  
16 quality was poor indeed) (Table 1). In contrast, two participants were screened as having sleep  
17  
18 disorders on the sleep questionnaire but assessed as 'no abnormality' on the sleep metre. Of  
19  
20 the three questionnaires, PSQI could identify the most sleep disorders and the identified sleep  
21  
22 disorders that could not be extracted by other scales.  
23  
24

25 According to the nurses' comprehensive assessment of 15 participants, factors which disturbed  
26  
27 sleep included inappropriate lifestyle behaviours such as intake of alcohol before going to bed,  
28  
29 lack of activity during the daytime, and using a computer or smartphone before going to bed.  
30  
31 We also found that most participants have several other physical conditions, like polyuria and  
32  
33 pain. Suspected SAS and periodic limb movement disorders were also found in six and three  
34  
35 participants, respectively.  
36  
37

38 To understand the characteristics of participants with sleep disorders, we compared their  
39  
40 baseline data with those without sleep disorders (Table 2). Although the divided sample size  
41  
42 was small and difficult to compare, the results showed that participants with sleep disorders  
43  
44  
45  
46  
47  
48  
49  
50  
51  
52  
53  
54  
55  
56  
57  
58  
59  
60

1  
2  
3  
4 had higher BMI, BP, and lipid profile, and lower renal function and subjective health status at  
5  
6  
7 baseline.  
8  
9

### 10 11 12 13 **Efficacy of the programme (one-way analysis)** 14

15  
16 To examine programme efficacy, baseline conditions were compared to outcomes during the  
17  
18 3<sup>rd</sup> and 6<sup>th</sup> months of intervention (Table 3, Figure 3). BMI, SBP, non-HDL-c, and HbA1c  
19  
20 improved significantly ( $p<0.05$ ). Renal functions (eGFR) did not change. QOL score and  
21  
22 subjective health status also improved significantly ( $p<0.05$ ). Considering the sleep  
23  
24 questionnaires, there was no significant difference between the scores before and after the  
25  
26 intervention [median (interquartile range) = 1 (1–2), 2 (1–2.25), respectively,  $p=0.317$ ,  $Z= -$   
27  
28 1.000]. Activity levels measured by steps were maintained but did not show any significant  
29  
30 improvement ( $p=0.271$ ). Changes in all self-management behaviours improved significantly  
31  
32 ( $p<0.05$ ).  
33  
34  
35  
36  
37  
38  
39  
40  
41  
42

43 One participant started while another was being tapered off antihypertensive medication during  
44  
45 the study. There was no change in the prescription for hypoglycaemic drugs. One participant  
46  
47 was being tapered off insulin. However, no participant had started taking sleep medication  
48  
49 during the study.  
50  
51  
52  
53

54  
55 To examine how the increase in exercise improved sleep status, we analysed the relationship  
56  
57 between them at the end of the six-month programme for all 24 participants (Figure 4). The  
58  
59  
60

1  
2  
3  
4 results showed that the ISI score and exercise level (number of steps per day) were moderately  
5  
6  
7 negatively correlated ( $r=0.395$ ,  $p=0.056$ ). In other words, the greater the amount of exercise,  
8  
9  
10 the lower the severity of insomnia and the better the quality of sleep. There were positive  
11  
12  
13 relationships among the PSQI (degree of sleep disorder) score, JESS (sleepiness in the daytime)  
14  
15  
16 score, scores on the sleep metre, and exercise frequency, but these were not statistically  
17  
18  
19 significant.  
20  
21  
22  
23  
24

### 25 **Feasibility of the programme**

26  
27  
28 All participants except one (96%) were satisfied with this programme, the nurses' intervention,  
29  
30  
31 and the fitness club for those who attended it. In contrast, the use of the sleep metre and the  
32  
33  
34 consultation that the nurse gave regarding sleep disorders were negatively evaluated (they were  
35  
36  
37 evaluated as 'useful' by 36% and 30%, respectively).  
38  
39

40  
41  
42 Attending a fitness club was highly evaluated based on the free comments, as the participants  
43  
44  
45 acquired exercise habits and had fun learning the correct techniques of doing the exercises.

46  
47  
48 Participants who underwent sleep assessment and consultation were more likely to  
49  
50  
51 acknowledge the importance of awareness and understanding of their sleep conditions and how  
52  
53  
54 they were related to DM. For instance, one participant reported that his snoring disappeared.

55  
56  
57 In contrast, most participants tended to make negative comments stating that the use of the  
58  
59  
60 sleep metre was bothersome and difficult to implement, and that they were likely to discontinue

1  
2  
3  
4 its use. Some participants were frustrated and refused to change their behaviours, saying “*even*  
5  
6  
7 *if you point out the sleep problem, there is no need to change now, because there is no*  
8  
9  
10 *discomfort.*”  
11  
12  
13  
14  
15

## 16 **DISCUSSION**

17  
18  
19 In this pilot study, we aimed to evaluate the efficacy of the self-management programme for  
20  
21  
22 diabetes by incorporating measures aimed at improving sleep and increasing physical  
23  
24  
25 activity. Moreover, to detect the persons who had sleep disorders, we applied three subjective  
26  
27  
28 questionnaires and an objective sleep metre for sleep assessment.  
29  
30

31 We found that 62.5% of the participants had sleep disorders, which was higher than the  
32  
33  
34 previously reported studies involving diabetic patients.<sup>32-33</sup> It is important to note that our  
35  
36  
37 study is different from these previous studies, since these evaluated sleep disorders using  
38  
39  
40 subjective surveys. However, in this study, sleep disorders were objectively evaluated as  
41  
42  
43 well. For instance, a few participants were not aware that they had insomnia, which was  
44  
45  
46 determined only through objective evaluation using a sleep metre. A previous study reported  
47  
48  
49 that diabetic patients may have difficulty in perceiving sleep disorders due to neuropathy.<sup>34</sup>  
50  
51  
52 Therefore, our results suggest that it is useful to identify high-risk individuals with sleep  
53  
54  
55 disorders and recommend that a sleep metre needs to be used first before administering the  
56  
57  
58 questionnaires. When individuals refuse to use a sleep metre, the PSQI, which broadly  
59  
60



1  
2  
3  
4 identifies insomnia, should be administered. As a majority of the participants in this study  
5  
6  
7 negatively evaluated the use of sleep metres, medical professionals will need to emphasise  
8  
9  
10 the importance of objective assessment.  
11  
12

13 In terms of preventing aggravation of the early stage of diabetic nephropathy, the  
14  
15  
16 physiological and behavioural results of this study suggest that this integrated programme  
17  
18  
19 was effective, except for use in sleep interventions due to the small sample size. Our pilot  
20  
21  
22 study found that all the participants showed significant improvements in self-management  
23  
24  
25 activities by eating healthy meals, exercising, and self-monitoring. This resulted in a  
26  
27  
28 significant improvement in BMI, SBP, and HbA1c, which further decreases the future  
29  
30  
31 development of vascular complications.<sup>35</sup> Subsequently, patients' QOL scores and subjective  
32  
33  
34 assessment of health improved significantly. However, few patients with type 2 DM felt the  
35  
36  
37 disease-specific distress to maintain self-management of DM throughout their lives.<sup>36-37</sup> The  
38  
39  
40 structured behavioural self-management education evaluated in this study might have  
41  
42  
43 improved the participants' subjective rating of health.<sup>37</sup>  
44  
45

46 Regarding the relationship between exercise frequency and changes in sleep state, ISI scores  
47  
48  
49 decreased (improved) and sleep metre score increased (improved), as exercise frequency  
50  
51  
52 increased. This result indicated that, as expected, increasing exercise frequency contributed to  
53  
54  
55 improvements in sleep condition, although statistically significant improvements were not  
56  
57  
58 observed in the quality of sleep itself. Many studies have reported the positive relationship  
59  
60

1  
2  
3  
4 between exercise and quality of sleep by improving the symptoms seen in respiratory-related  
5  
6  
7 sleep disorders. Moreover, continuous exercise and weight loss were found to improve  
8  
9  
10 glycaemic control.<sup>13, 38</sup> These positive effects might have been affected by peer-support and  
11  
12  
13 group dynamics based on the comments of participants who utilised the fitness club.<sup>39</sup>  
14  
15  
16 Therefore, in a diabetes self-education programme incorporating sleep improvement,  
17  
18  
19 performing periodic exercise by enrolling in fitness clubs may be beneficial.  
20  
21  
22  
23  
24

25 In this study, the participants' evaluation of sleep assessment and nurses' consultation for  
26  
27  
28 sleep improvement was poorly evaluated, and the results did not support sleep improvement.  
29  
30  
31 The participants in this study had poor glycaemic control compared to type 2 DM patients  
32  
33  
34 with sleep disorders which is consistent with other interventional studies.<sup>19, 40</sup> Additionally,  
35  
36  
37 although there was a high prevalence of sleep disorders in this population and multiple sleep-  
38  
39  
40 inhibitory factors such as suspicion of SAS, pain, and unhealthy lifestyles were present in  
41  
42  
43 patients with sleep disorders, most participants did not recognise that they had sleep disorders  
44  
45  
46 or that it could aggravate DM. Therefore, there was a need for sleep assessment, motivating  
47  
48  
49 tailored education and referral to a specialist. Since DM with sleep disorders have several  
50  
51  
52 risks, this programme needs to be implemented for a longer period of time, with the content  
53  
54  
55 taught in the following order—DM education first, followed by sleep education/problem-  
56  
57  
58 solving, which will be more realistic and acceptable.  
59  
60

## Limitations

As this project was a pilot study, a small sample size and a non-controlled study design were implemented, which made it difficult to analyse with strong statistical power. Besides, due to the small sample size, we cannot compare the sleep intervention effect itself as the physical indicators and QOL of participants as a group improved significantly. Additionally, this was a community-based study (local government project) with a complex protocol, which led to missing out certain existing data, making the statistical comparison difficult. In the future, it is necessary to simplify and verify the programme's effect on a larger population as well as account for the prevalence of sleep disorders in the analysis. Moreover, this study had an intervention period of six months; hence, it is recommended to establish a longer-term intervention and monitoring period because the unpredictability of the factors can hinder sleep in diabetic patients to completely identify the impacts of this program. Also, further research with a large sample size should be conducted to evaluate the effectiveness of the intervention.

## CONCLUSION

We conducted a self-management programme for the patients with diabetic nephropathy (up to the third stage) aimed at improving sleep and increasing physical activity. BMI, SBP,

1  
2  
3  
4 HbA1c, QOL scores, and subjective health perceptions of all patients improved significantly  
5  
6  
7 after the intervention. As for sleep-related evaluation indicators, there were some participants  
8  
9  
10 who showed improvement on objective evaluation by the sleep metre but remained  
11  
12  
13 unchanged when the subjective evaluation index was used. While the direct impacts of sleep  
14  
15  
16 intervention were not observed in these results, the necessity of this programme was  
17  
18  
19 highlighted, allowing us to consider approaches to improve it for its full-scale  
20  
21  
22 implementation in the future.  
23  
24  
25  
26  
27

## 28 **ACKNOWLEDGMENTS**

29  
30  
31 We thank the Hiroshima Prefecture, Division of Integrated Care & Elderly support and the  
32  
33  
34 Hiroshima City, Division of Health & Welfare, Insurance and Pension Section for initiating  
35  
36  
37 and funding this project.  
38  
39

40 We also thank the study participants and their primary physicians for their help in completing  
41  
42  
43 this project.  
44  
45

46 We acknowledge the contribution of Madoka Kawai, RN, Muzuho Yamaguchi, RN, and Mie  
47  
48  
49 Fukushima, RN, who implemented the program.  
50  
51

52 Our sincere thanks to Naoko Matsumoto, MS, her staff, and Health Fitness trainer from  
53  
54  
55 Medical Fitness B-1, Hiroshima, for the provision of the study's fitness interventions.  
56  
57  
58  
59  
60

## CONFLICTS OF INTEREST

The authors declare no conflict of interest.

## CONTRIBUTORSHIP STATEMENT

RS was involved in research design, data collection, analysis, and manuscript writing. KK and YJ were involved in data analysis and manuscript writing. NT was involved in program and educational material development. MM was involved in overall research design including program development and manuscript writing. All authors read and approved the final manuscript.

## FUNDING

This work was supported by a Grant-in-Aid for Scientific Research (B) (No. 15H05078) and was funded by Hiroshima Prefecture and Hiroshima City as a joint research.

## COMPETING INTERESTS

The authors declare no potential conflicts of interest with respect to the research, authorship, and/or publication of this article.

## DATA AVAILABILITY STATEMENT

1  
2  
3  
4 This was the joint project of Hiroshima Prefecture and Hiroshima City, and the data cannot be  
5  
6  
7 publicly available in order to guarantee the anonymity of participants. No additional data  
8  
9  
10 available.

## 16 **ETHICS STATEMENT**

17  
18  
19 The study protocol was approved by Hiroshima University Ethics Committee (No. C-140).  
20  
21  
22 Written informed consent was obtained from each participant. This study was conducted under  
23  
24  
25 the health insurance system of Japan and performed in accordance with the Declaration of  
26  
27  
28 Helsinki and the Ethical Guidelines on Clinical Studies of the Ministry of Health, Labour and  
29  
30  
31 Welfare of Japan. This study is registered under the following ID: UMIN000025906.  
32  
33  
34  
35  
36

## 37 **REFERENCES**

- 38  
39  
40 1. Gettlieb DJ, Punjabi NM, Newman AB, *et al.* Association of Sleep Time With Diabetes  
41  
42 Mellitus and Impaired Glucose Tolerance. *Arch Intern Med* 2005;165(8):863-7.  
43  
44  
45 <https://doi:10.1001/archinte.165.8.863>  
46  
47  
48  
49 2. Cappuccio FP, D'Elia L, Strazzullo P, *et al.* Quantity and quality of sleep and incidence  
50  
51 of type 2 diabetes: a systematic review and meta-analysis. *DIABETES CARE*  
52  
53  
54 2010;33:414-20. <https://doi:10.2337/dc09-1124>  
55  
56  
57  
58  
59  
60

- 1  
2  
3  
4 3. Zizi F, Jean-Louis G, Brown CD, *et al.* Sleep duration and the risk of diabetes mellitus:  
5  
6 epidemiologic evidence and pathophysiologic insights. *Curr Diab Rep* 2010;10(1):43-7.  
7  
8  
9  
10 <https://doi:10.1007/s11892-009-0082-x>  
11  
12
- 13 4. Spiegel K, Knutson K, Leproult R, *et al.* Sleep loss: a novel risk factor for insulin  
14  
15 resistance and Type 2 diabetes. *J Appl Physiol* 2005;99(5): 2008-19.  
16  
17  
18 <https://doi:10.1152/jappphysiol.00660.2005>  
19  
20  
21
- 22 5. Rosique-Esteban N, Papandreou C, Romaguera D, *et al.* Cross-sectional associations of  
23  
24 objectively-measured sleep characteristics with obesity and type 2 diabetes in the  
25  
26  
27  
28 PREDIMED-Plus trial. *Sleep* 2018;41(12). <https://doi:10.1093/sleep/zsy190>  
29  
30
- 31 6. Inkster B, Riha RL, Van Look L, *et al.* Association between excessive daytime  
32  
33 sleepiness and severe hypoglycemia in people with type 2 diabetes: the Edinburgh Type  
34  
35  
36  
37  
38  
39  
40  
41  
42  
43  
44  
45  
46  
47  
48  
49  
50  
51  
52  
53  
54  
55  
56  
57  
58  
59  
60  
2 Diabetes Study. *DIABETES CARE* 2013;36:4157-9. <https://doi:10.2337/dc13-0863>
7. Bruyneel M, Kleynen P, Poppe K. Prevalence of undiagnosed glucose intolerance and  
type 2 diabetes in patients with moderate-to-severe obstructive sleep apnea syndrome.  
*Sleep Breath* 2019. <https://doi:10.1007/s11325-019-01989-y>
8. Tahrani AA, Ali A, Raymond NT, Begum S, Dubb K, Mughal S, Jose B, Piya MK,  
Barnett AH, Stevens MJ. Obstructive sleep apnea and diabetic neuropathy: a novel  
association in patients with type 2 diabetes. *Am J Respir Crit Care Med.* 2012 Sep  
1;186(5):434-41. <https://doi:10.1164/rccm.201112-2135OC>.

- 1  
2  
3  
4 9. Martínez Cerón E, Casitas Mateos R, García-Río F. Sleep apnea-hypopnea syndrome and  
5  
6  
7 type 2 diabetes. A reciprocal relationship? Arch Bronconeumol. 2015 Mar;51(3):128-39.  
8  
9  
10 English, Spanish. [https://doi: 10.1016/j.arbres.2014.06.017](https://doi:10.1016/j.arbres.2014.06.017).  
11  
12  
13 10. Modarresnia L, Golgiri F, Madani NH, et al. Restless Legs Syndrome in Iranian People  
14  
15  
16 With Type 2 Diabetes Mellitus: The Role in Quality of Life and Quality of Sleep. J Clin  
17  
18  
19 Sleep Med 2018;14(2):223-8. <https://doi:10.5664/jcsm.6938>  
20  
21  
22 11. Chasens ER, Korytkowski M, Sereika SM, et al. Effect of poor sleep quality and  
23  
24  
25 excessive daytime sleepiness on factors associated with diabetes self-management.  
26  
27  
28 Diabetes Educ 2013;39(1):74-82. <https://doi:10.1177/0145721712467683>  
29  
30  
31 12. Oda A, Inagaki M, Tasaki K, et al. The Concept of Sleep Ability and its Effect on  
32  
33  
34 Diabetes Control in Adults With Type 2 Diabetes. Can J Diabetes 2019;43:329-35.  
35  
36  
37 <https://doi:10.1016/j.jcjd.2018.11.007>  
38  
39  
40 13. Hayes C, Kriska A. Role of physical activity in diabetes management and prevention. J  
41  
42  
43 Am Diet Assoc 2008;108(Suppl. 1): S19-23. <https://doi:10.1016/j.jada.2008.01.016>  
44  
45  
46 14. Zanuso S, Balducci S, Jimenez A. Physical activity, a key factor to quality of life in type  
47  
48  
49 2 diabetic patients. Diabetes Metab Res Rev 2009;25(Suppl. 1):S24-8.  
50  
51  
52 <https://doi:10.1002/dmrr.984>  
53  
54  
55  
56  
57  
58  
59  
60



- 1  
2  
3  
4 15. Waryasz GR, McDermott AY. Exercise prescription and the patient with type 2 diabetes:  
5  
6  
7 a clinical approach to optimizing patient outcomes. *J Am Acad Nurse Pract*  
8  
9  
10 2010;22(4):217-27. <https://doi:10.1111/j.1745-7599.2010.00490.x>  
11  
12
- 13 16. Balducci S, Sacchetti M, Haxhi J, *et al.* Physical exercise as therapy for type 2 diabetes  
14  
15  
16 mellitus. *Diabetes Metab Res Rev* 2014;30(Suppl. 1):13-23. [https://](https://doi:10.1002/dmrr.2514)  
17  
18  
19 doi:10.1002/dmrr.2514  
20  
21
- 22 17. Sivertsen B, Omvik S, Pallesen S, *et al.* Cognitive Behavioural Therapy vs Zopiclone for  
23  
24  
25 Treatment of Chronic Primary Insomnia in Older Adults. A Randomized Controlled  
26  
27  
28 Trial. *JAMA* 2006;295(24):2851-8. <https://doi:10.1001/jama.295.24.2851>  
29  
30
- 31 18. Wickboldt AT, Bowen AF, Kaye AJ, *et al.* Sleep Physiology, Abnormal States, and  
32  
33  
34 Therapeutic Interventions. *Ochsner J* 2012;12(2):122-34.  
35  
36
- 37 19. Khosravan S, Alami A, Golchin Rahni S. Effects of continuous care model based non-  
38  
39  
40 pharmacological intervention on sleep quality in patients with type 2 diabetes mellitus: a  
41  
42  
43 randomized controlled clinical trial. *Int J Community Based Nurs Midwifery* 2015;3(2):  
44  
45  
46 96-104.  
47  
48
- 49 20. The Japan Diabetes Society. Chronic complications. 2 Diabetic nephropathy. *Treatment*  
50  
51  
52 *guide for diabetes* 2020.  
53  
54  
55  
56  
57  
58  
59  
60

- 1  
2  
3  
4 21. Kato S, Shimogaki H, Onodera A, *et al.* Development of the revised version of  
5  
6  
7 Hasegawa's Dementia Scale (HDS-R). *Japanese journal of geriatric psychiatry*  
8  
9  
10 1991;2(11):1339-47 (in Japanese).  
11  
12  
13 22. Munezawa T, Morin CM, Inoue Y, *et al.* Development of the Japanese version of the  
14  
15  
16 Insomnia Severity Index (ISI-J). *Japan. Journal of Psychiatry Treatment* 2009;24:219-25  
17  
18  
19 (in Japanese).  
20  
21  
22 23. Doi Y, Minowa M, Uchiyama M, *et al.* Psychometric assessment of subjective sleep  
23  
24  
25 quality using the Japanese version of the Pittsburgh Sleep Quality Index (PSQI-J) in  
26  
27  
28 psychiatric disordered and control subjects. *Psychiatry Res* 2000;97(2-3):165-72.  
29  
30  
31 24. Takegami M, Suzukamo Y, Wakita T, *et al.* Development of a Japanese version of the  
32  
33  
34 Epworth Sleepiness Scale (JESS) based on item response theory. *Sleep Med*  
35  
36  
37 2009;10(5):556-65. <https://doi:10.1016/j.sleep.2008.04.015>  
38  
39  
40 25. Kogure T, Shirakawa S, Shimokawa M, Hosokawa Y. Automatic sleep/wake scoring  
41  
42  
43 from body motion in bed: validation of a newly developed sensor placed under a  
44  
45  
46 mattress. *J Physiol Anthropol* 2011;30(3):103-9. <https://doi:10.2114/jpa2.30.103>. s  
47  
48  
49 26. Kogure T, Ebata T. Activity During Sleep Measured by a Sheet-Shaped Body  
50  
51  
52 Vibrometer and the Severity of Atopic Dermatitis in Adults: A Comparison With Wrist  
53  
54  
55 Actigraphy. *J Clin Sleep Med* 2018;14(2):199-204. <https://doi:10.5664/jcsm.6932>.  
56  
57  
58  
59  
60

- 1  
2  
3  
4 27. Ikeda S, Shiraiwa T, Igarashi A, *et al.* Developing a Japanese version of the EQ-5D-5L  
5  
6  
7 value set. *Journal of the National Institute of Public Health* 2015;64(1): 47-55 (in  
8  
9  
10 Japanese).
- 11  
12  
13 28. Sateia MJ. International Classification of Sleep Disorders-Third Edition: Highlights and  
14  
15  
16 Modifications. *Chest* 2014;146(5):1387-94. <https://doi:10.1378/chest.14-0970>  
17  
18
- 19 29. Kazawa K, Takeshita Y, Yorioka N, *et al.* Efficacy of a disease management program  
20  
21  
22 focused on acquisition of self-management skills in pre-dialysis patients with diabetic  
23  
24  
25 nephropathy: 24 months follow-up. *J Nephrol* 2015;329-38. [https://doi:10.1007/s40620-](https://doi:10.1007/s40620-014-0144-2)  
26  
27  
28 014-0144-2  
29
- 30  
31 30. Kazawa K, Moriyama M. Effects of a Self-Management Skills-Acquisition Program on  
32  
33  
34 Pre-Dialysis Patients with Diabetic Nephropathy. *Nephrol Nurs J* 2013;141-8.  
35  
36
- 37 31. Toyoshima A, Moriyama M, Yamashita H, Rahman MM, Huq KATME, Jahan Y,  
38  
39  
40 Kazawa K. Understanding the process for developing sleep disorders among Japanese  
41  
42  
43 workers: a qualitative study. *Health Promotion Perspectives* 2020;11(1):87-96.  
44  
45  
46 [https://doi: 10.34172/hpp.2021.12](https://doi:10.34172/hpp.2021.12).  
47  
48
- 49 32. Arosemena CM, Sánchez AJ, Tettamanti MD, *et al.* Excessive daytime somnolence is  
50  
51  
52 associated with hypoglycemia in adult Latinos with type 2 diabetes mellitus. *Sleep Med*  
53  
54  
55 2017;36:6-9. <https://doi:10.1016/j.sleep.2017.04.012>  
56  
57  
58  
59  
60

- 1  
2  
3  
4 33. Otaka H, Murakami H, Nakayama H, *et al.* Association between insomnia and  
5  
6  
7 personality traits among Japanese patients with type 2 diabetes mellitus. *J Diabetes*  
8  
9  
10 *Investig* 2019;10(2):484-90. <https://doi:10.1111/jdi.12927>  
11  
12  
13 34. Nakajima H, Kaneita Y, Yokoyama E, *et al.* Association between sleep duration and  
14  
15  
16 hemoglobin A1c level. *Sleep Med* 2008;9(7):745-52.  
17  
18  
19 <https://doi:10.1016/j.sleep.2007.07.017>  
20  
21  
22 35. Gaede PL, Lund-Anderson H, Parving HH, *et al.* Effect of a multifactorial intervention  
23  
24  
25 on mortality in type 2 diabetes. *N Engl J Med* 2008;358:580-91.  
26  
27  
28 36. Perrin NE, Davies MJ, Robertson N, *et al.* The prevalence of diabetes-specific emotional  
29  
30  
31 distress in people with Type 2 diabetes: a systematic review and meta-analysis. *Diabetic*  
32  
33  
34 *Med* 2017;34(11):1508-20. <https://doi:10.1111/dme.13448>  
35  
36  
37 37. Perrin N, Bodicoat DH, Davies MJ, *et al.* Effectiveness of psychoeducational  
38  
39  
40 interventions for the treatment of diabetes-specific emotional distress and glycaemic  
41  
42  
43 control in people with type 2 diabetes: A systematic review and meta-analysis. *Prim*  
44  
45  
46 *Care Diabetes* 2019;13(6):556-67. <https://doi:10.1016/j.pcd.2019.04.001>  
47  
48  
49 38. Isobe Y, Nakatsumi Y, Sugiyama Y, *et al.* Severity Indices for Obstructive Sleep Apnea  
50  
51  
52 Syndrome Reflecting Glycemic Control or Insulin Resistance. *Intern Med* 2019;58(22):  
53  
54  
55 3227-34. <https://doi:10.2169/internalmedicine.3005-19>  
56  
57  
58  
59  
60

- 1  
2  
3  
4 39. Ha M, Chen J, Zhang X, *et al.* Relationships of social support, health-promoting  
5  
6 lifestyles, glycemic control, and bone turnover among adults with type 2 diabetes. *Jpn J*  
7  
8 *Nurs Sci* 2020;17(1):e12280. [https:// doi: 10.1111/jjns.12280](https://doi.org/10.1111/jjns.12280)  
9  
10  
11  
12  
13 40. Siegmann MJ, Athinarayanan SJ, Hallberg SJ, *et al.* Improvement in patient-reported  
14  
15 sleep in type 2 diabetes and prediabetes participants receiving a continuous care  
16  
17 intervention with nutritional ketosis. *Sleep Med* 2019;55: 92-9.  
18  
19  
20  
21  
22 [https://doi:10.1016/j.sleep.2018.12.014](https://doi.org/10.1016/j.sleep.2018.12.014)  
23  
24  
25  
26  
27

28 Figure 1. Framework of the intervention program  
29

30  
31  
32  
33  
34 Figure 2. Flow diagram of the participants  
35  
36  
37  
38  
39

40 Figure 3. Changes in self-management behaviours  
41  
42  
43  
44  
45

46 Figure 4. Relationship between the sleep status and exercise frequency  
47  
48  
49  
50  
51

52 Supplemental file 1. Evaluation of a sensor mat type sleep metre (NEMURI SCAN NN-1310)  
53  
54  
55 result  
56  
57  
58  
59  
60

Supplemental file 2. The educational textbook for sleep disorder: Excerpt only from the problem area and the algorithm part of the countermeasure

Table 1. Assessment results of the participants' sleep at baseline

n = 24

| Number of people with sleep disorders<br>n (%) | Applicable to sleep disorder on other scales |           |           |             | Not applicable to sleep disorders on any other scales | Total number |
|------------------------------------------------|----------------------------------------------|-----------|-----------|-------------|-------------------------------------------------------|--------------|
|                                                | ISI                                          | PSQI      | JESS      | Sleep meter |                                                       |              |
| ISI<br>( 8 points ≤ )                          |                                              | 6 (75.0%) | 2 (25.0%) | 8 (100.0%)  | 0 (0.0%)                                              | 8 (100.0%)   |
| PSQI<br>( 6 points ≤ )                         | 6 (66.7%)                                    |           | 1 (11.1%) | 7 (77.8%)   | 2 (22.2%)                                             | 9 (100.0%)   |
| JESS<br>( 11 points ≤ )                        | 2 (100.0%)                                   | 1 (50.0%) |           | 2 (100.0%)  | 0 (0.0%)                                              | 2 (100.0%)   |
| Sleep meter<br>( ≤ 2 points )                  | 8 (61.5%)                                    | 7 (53.8%) | 2 (15.4%) |             | 4 (30.8%)                                             | 13 (100.0%)  |

Note; ISI = Insomnia Severity Index, PSQI = Pittsburg Sleep Quality Index, JESS = The Japanese version of Epworth Sleepiness Scale

Of the 26 who agreed to participate in the study, two could not be evaluated for sleep because they declined immediately after consent.

Table 2. Comparison of baseline feature in groups with and without sleep disorders

|                          | Mean ± SD              |      |        |                               |      |       |
|--------------------------|------------------------|------|--------|-------------------------------|------|-------|
|                          | Sleep disorders (n=15) |      |        | Without sleep disorders (n=9) |      |       |
|                          | n                      |      |        | n                             |      |       |
| Age                      | 15                     | 64.4 | ± 6.8  | 9                             | 67.8 | ± 4.7 |
| Physiological indicators |                        |      |        |                               |      |       |
| - BMI                    | 15                     | 26.3 | ± 6.2  | 9                             | 23.7 | ± 2.3 |
| - SBP (mmHg)             | 12                     | 140  | ± 10.4 | 8                             | 136  | ± 19  |
| - DBP (mmHg)             | 12                     | 78.4 | ± 14   | 8                             | 71.9 | ± 6.5 |

|                                     |    |               |   |                 |
|-------------------------------------|----|---------------|---|-----------------|
| - eGFR (ml/min/1.73m <sup>2</sup> ) | 15 | 64.5 ± 22.5   | 9 | 67.6 ± 9.3      |
| - Triglyceride (mg/dl)              | 14 | 191.6 ± 121.7 | 9 | 148.3 ± 88.7    |
| - non HDL-c (mg/dl)                 | 14 | 146.9 ± 41.1  | 9 | 126 ± 19.6      |
| - HbA1c (%)                         | 15 | 8 ± 1         | 9 | 8 ± 1.4         |
| QOL                                 |    |               |   |                 |
| - Euro QOL-5D-5L (score)            | 15 | 0.83 ± 0.12   | 9 | 0.9 ± 0.09      |
| - Subjective health status (%)      | 15 | 69.9 ± 17.2   | 9 | 83.9 ± 12.4     |
| Number of steps per day             | 11 | 6819.7 ± 2399 | 9 | 8915.3 ± 3022.5 |
| Quality of sleep                    |    |               |   |                 |
| - ISI (score)                       | 15 | 8.4 ± 3.8     | 9 | 3.1 ± 2.2       |
| - PSQI (score)                      | 15 | 6.2 ± 2.2     | 9 | 2.7 ± 1.9       |
| - JESS (score)                      | 15 | 5.2 ± 3.5     | 8 | 3.8 ± 2.2       |

Note: BMI = Body mass index, SBP = Systolic blood pressure, DBP = Diastolic blood pressure, eGFR = estimated glomerular filtration rate, non HDL-c = non HDL-cholesterol, QOL = Quality of health, ISI = Insomnia Severity Index, PSQI = Pittsburgh Sleep Quality Index, JESS = The Japanese version of Epworth Sleepiness Scale

Table 3. Changes in outcomes

|                                     | n  | Baseline     | 3rd month    | 6th month       | Mean ± SD       | p-value      |              |
|-------------------------------------|----|--------------|--------------|-----------------|-----------------|--------------|--------------|
| Physiological indicators            |    |              |              |                 |                 |              |              |
| - BMI                               | 24 | 25.3 ± 5.2   | 24.7 ± 5.2   | 24.2 ± 5.1      | <0.001          | <sup>a</sup> |              |
| - SBP (mmHg)                        | 20 | 138.4 ± 14.1 | 129.3 ± 15.5 | 125.8 ± 15.4    | 0.009           | <sup>b</sup> |              |
| - DBP (mmHg)                        | 20 | 75.8 ± 11.8  | 70.4 ± 8.1   | 73.2 ± 11.9     | 0.156           | <sup>b</sup> |              |
| - eGFR (ml/min/1.73m <sup>2</sup> ) | 24 | 65.7 ± 18.4  | -            | 63 ± 13.1       | 0.886           | <sup>c</sup> |              |
| - Triglyceride (mg/dl)              | 23 | 174.0 ± 110  | -            | 165.2 ± 78.5    | 0.976           | <sup>c</sup> |              |
| - non HDL-c (mg/dl)                 | 23 | 138.8 ± 35.3 | -            | 122.3 ± 30.5    | 0.017           | <sup>d</sup> |              |
| - HbA1c (%)                         | 24 | 8.0 ± 1.2    | 7.4 ± 1.1    | 7.0 ± 0.9       | <0.001          | <sup>a</sup> |              |
| Number of steps per day             | 20 | 7762.8       | 2831.9       | 7597.4 ± 3509.1 | 7247.8 ± 3331.5 | 0.271        | <sup>b</sup> |
| QOL                                 |    |              |              |                 |                 |              |              |
| - Euro QOL-5D-5L (score)            | 24 | 0.86 ± 0.11  | -            | 0.89 ± 0.12     | 0.031           | <sup>d</sup> |              |
| - Subjective health status (%)      | 24 | 75.1 ± 16.8  | -            | 80.9 ± 14.5     | 0.016           | <sup>d</sup> |              |
| Quality of sleep                    |    |              |              |                 |                 |              |              |

|                |    |           |   |           |                    |
|----------------|----|-----------|---|-----------|--------------------|
| -ISI (score)   | 24 | 6.4 ± 4.2 | - | 6.4 ± 4.8 | 1.000 <sup>d</sup> |
| - PSQI (score) | 24 | 4.9 ± 2.7 | - | 5.5 ± 3.4 | 0.207 <sup>d</sup> |
| - JESS (score) | 23 | 4.7 ± 3.2 | - | 4.5 ± 3.2 | 0.739 <sup>d</sup> |

Note: a: Friedman test, b: ANOVA, c: Wilcoxon signed-rank test, d: t test

BMI = Body mass index, SBP = Systolic blood pressure, DBP = Diastolic blood pressure, eGFR = estimated glomerular

filtration rate, non HDL-c = non HDL-cholesterol, QOL = Quality of life, ISI = Insomnia Severity Index, PSQI = Pittsburg

Sleep Quality Index, JESS = The Japanese version of Epworth Sleepiness Scale

For peer review only



1  
2  
3  
4  
5  
6  
7  
8  
9  
10  
11  
12  
13  
14  
15  
16  
17  
18  
19  
20  
21  
22  
23  
24  
25  
26  
27  
28  
29  
30  
31  
32  
33  
34  
35  
36  
37  
38  
39  
40  
41  
42  
43  
44  
45  
46  
47  
48  
49  
50  
51  
52  
53  
54  
55  
56  
57  
58  
59  
60

For peer review only

1  
2  
3  
4  
5  
6  
7  
8  
9  
10  
11  
12  
13  
14  
15  
16  
17  
18  
19  
20  
21  
22  
23  
24  
25  
26  
27  
28  
29  
30  
31  
32  
33  
34  
35  
36  
37  
38  
39  
40  
41  
42  
43  
44  
45  
46  
47  
48  
49  
50  
51  
52  
53  
54  
55  
56  
57  
58  
59  
60

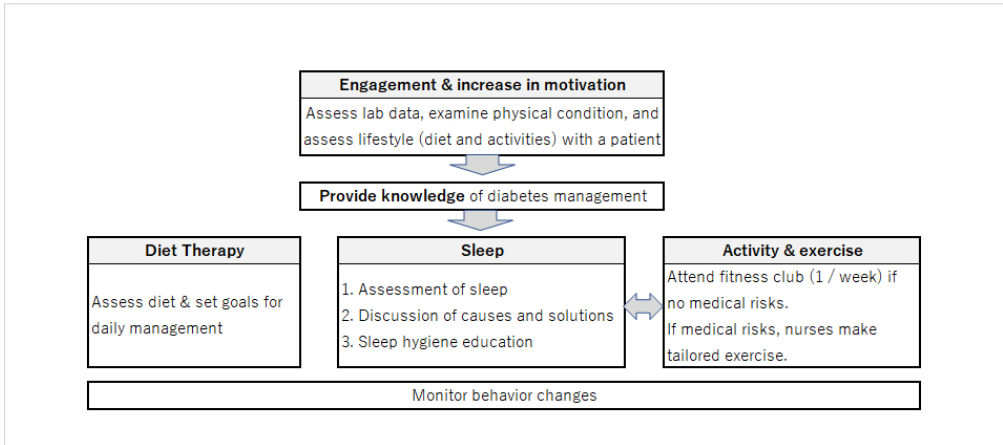

1  
2  
3  
4  
5  
6  
7  
8  
9  
10  
11  
12  
13  
14  
15  
16  
17  
18  
19  
20  
21  
22  
23  
24  
25  
26  
27  
28  
29  
30  
31  
32  
33  
34  
35  
36  
37  
38  
39  
40  
41  
42  
43  
44  
45  
46  
47  
48  
49  
50  
51  
52  
53  
54  
55  
56  
57  
58  
59  
60

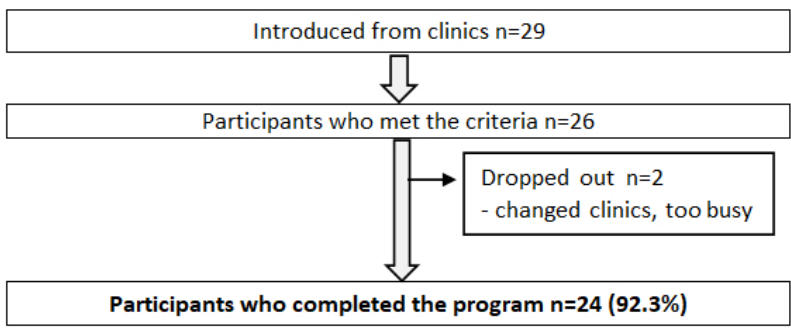

1  
2  
3  
4  
5  
6  
7  
8  
9  
10  
11  
12  
13  
14  
15  
16  
17  
18  
19  
20  
21  
22  
23  
24  
25  
26  
27  
28  
29  
30  
31  
32  
33  
34  
35  
36  
37  
38  
39  
40  
41  
42  
43  
44  
45  
46  
47  
48  
49  
50  
51  
52  
53  
54  
55  
56  
57  
58  
59  
60



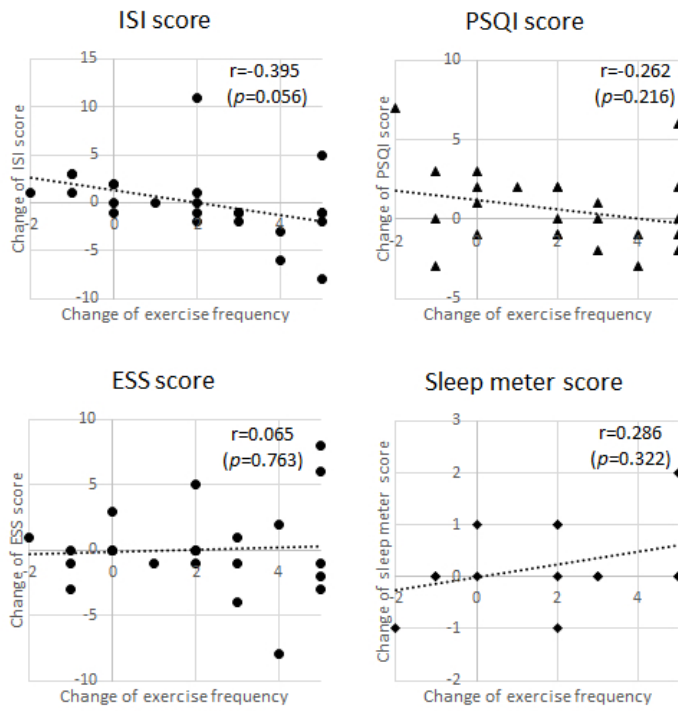

Note: ISI = Insomnia Severity Index, PSQI = Pittsburg Sleep Quality Index, ESS = The Epworth Sleepiness Scale

## Supplemental file 1

## Evaluation of a sleep metre result (Example)

- Created based on the company's format (NEMURI SCAN NN-1310; Paramount bed Co., Ltd)
- Evaluation criteria are set by Paramount bed Co., Ltd.
- We converted A to 4, B to 3, C to 2, and D to 1, for calculation purpose.
- Total evaluation reflects the worst evaluation item among all items.

Date: XX, XX, 20XX Mr. xxxx.

Total Evaluation: D (Improvement required)

| Sleep index                    | Value     | Evaluation | Criteria                                                                                                                                                                                                                            |
|--------------------------------|-----------|------------|-------------------------------------------------------------------------------------------------------------------------------------------------------------------------------------------------------------------------------------|
| Total sleep time               | 6h 16min  | B          | The total amount of time you actually slept from bedtime to wake-up time.<br>A: $\geq 6.5$ h, $< 8$ h,<br>B: $\geq 6$ h, $< 6.5$ h or $\geq 8$ h, $< 9$ h<br>C: $\geq 5$ h, $< 6$ h or $\geq 9$ , $< 10$<br>D: $< 5$ h or $\geq 10$ |
| Total time in bed              | 8h 13min  | B          | The total amount of time from bedtime to wake-up time.<br>Criteria: Same as the total sleep time                                                                                                                                    |
| Time for bed (bedtime)         | 22:49     | reference  | Time you laid on bed                                                                                                                                                                                                                |
| Wake-up time                   | 7:03      | reference  | Time you left from bed                                                                                                                                                                                                              |
| Sleep latency                  | 23.4min   | C          | The time it took from bedtime to falling asleep.<br>A: $< 10$ min, B: $\geq 10$ min, $< 20$ min,<br>C: $\geq 20$ min, $< 30$ min, D: $\geq 30$ min                                                                                  |
| Sleep efficiency               | 76.2%     | C          | Percentage of time actually asleep from bedtime to wake up.<br>(Total sleep time / Total time in bed x 100 [%])<br>A: $\geq 95\%$ , B: $\geq 85\%$ , $< 95\%$<br>C: $\geq 75\%$ , $< 85\%$ , D: $< 75\%$                            |
| Wakefulness after sleep onset  | 92.1min   | D          | The total amount of time you woke up in the middle of your sleep between falling asleep and waking up.<br>A: $< 10$ min, B: $\geq 10$ min, $< 20$ min<br>C: $\geq 20$ min, $< 40$ min, D: $\geq 40$ min                             |
| Number of out-of-bed instances | 1.5 times | C          | The number of times you have left from bed for toilet, etc.<br>A: 0 time, B: $< 1$ time,<br>C: $\geq 1$ time, $< 2$ times, D: $\geq 2$ times                                                                                        |

# Let's check if you have sleep problems (Physical aspect)

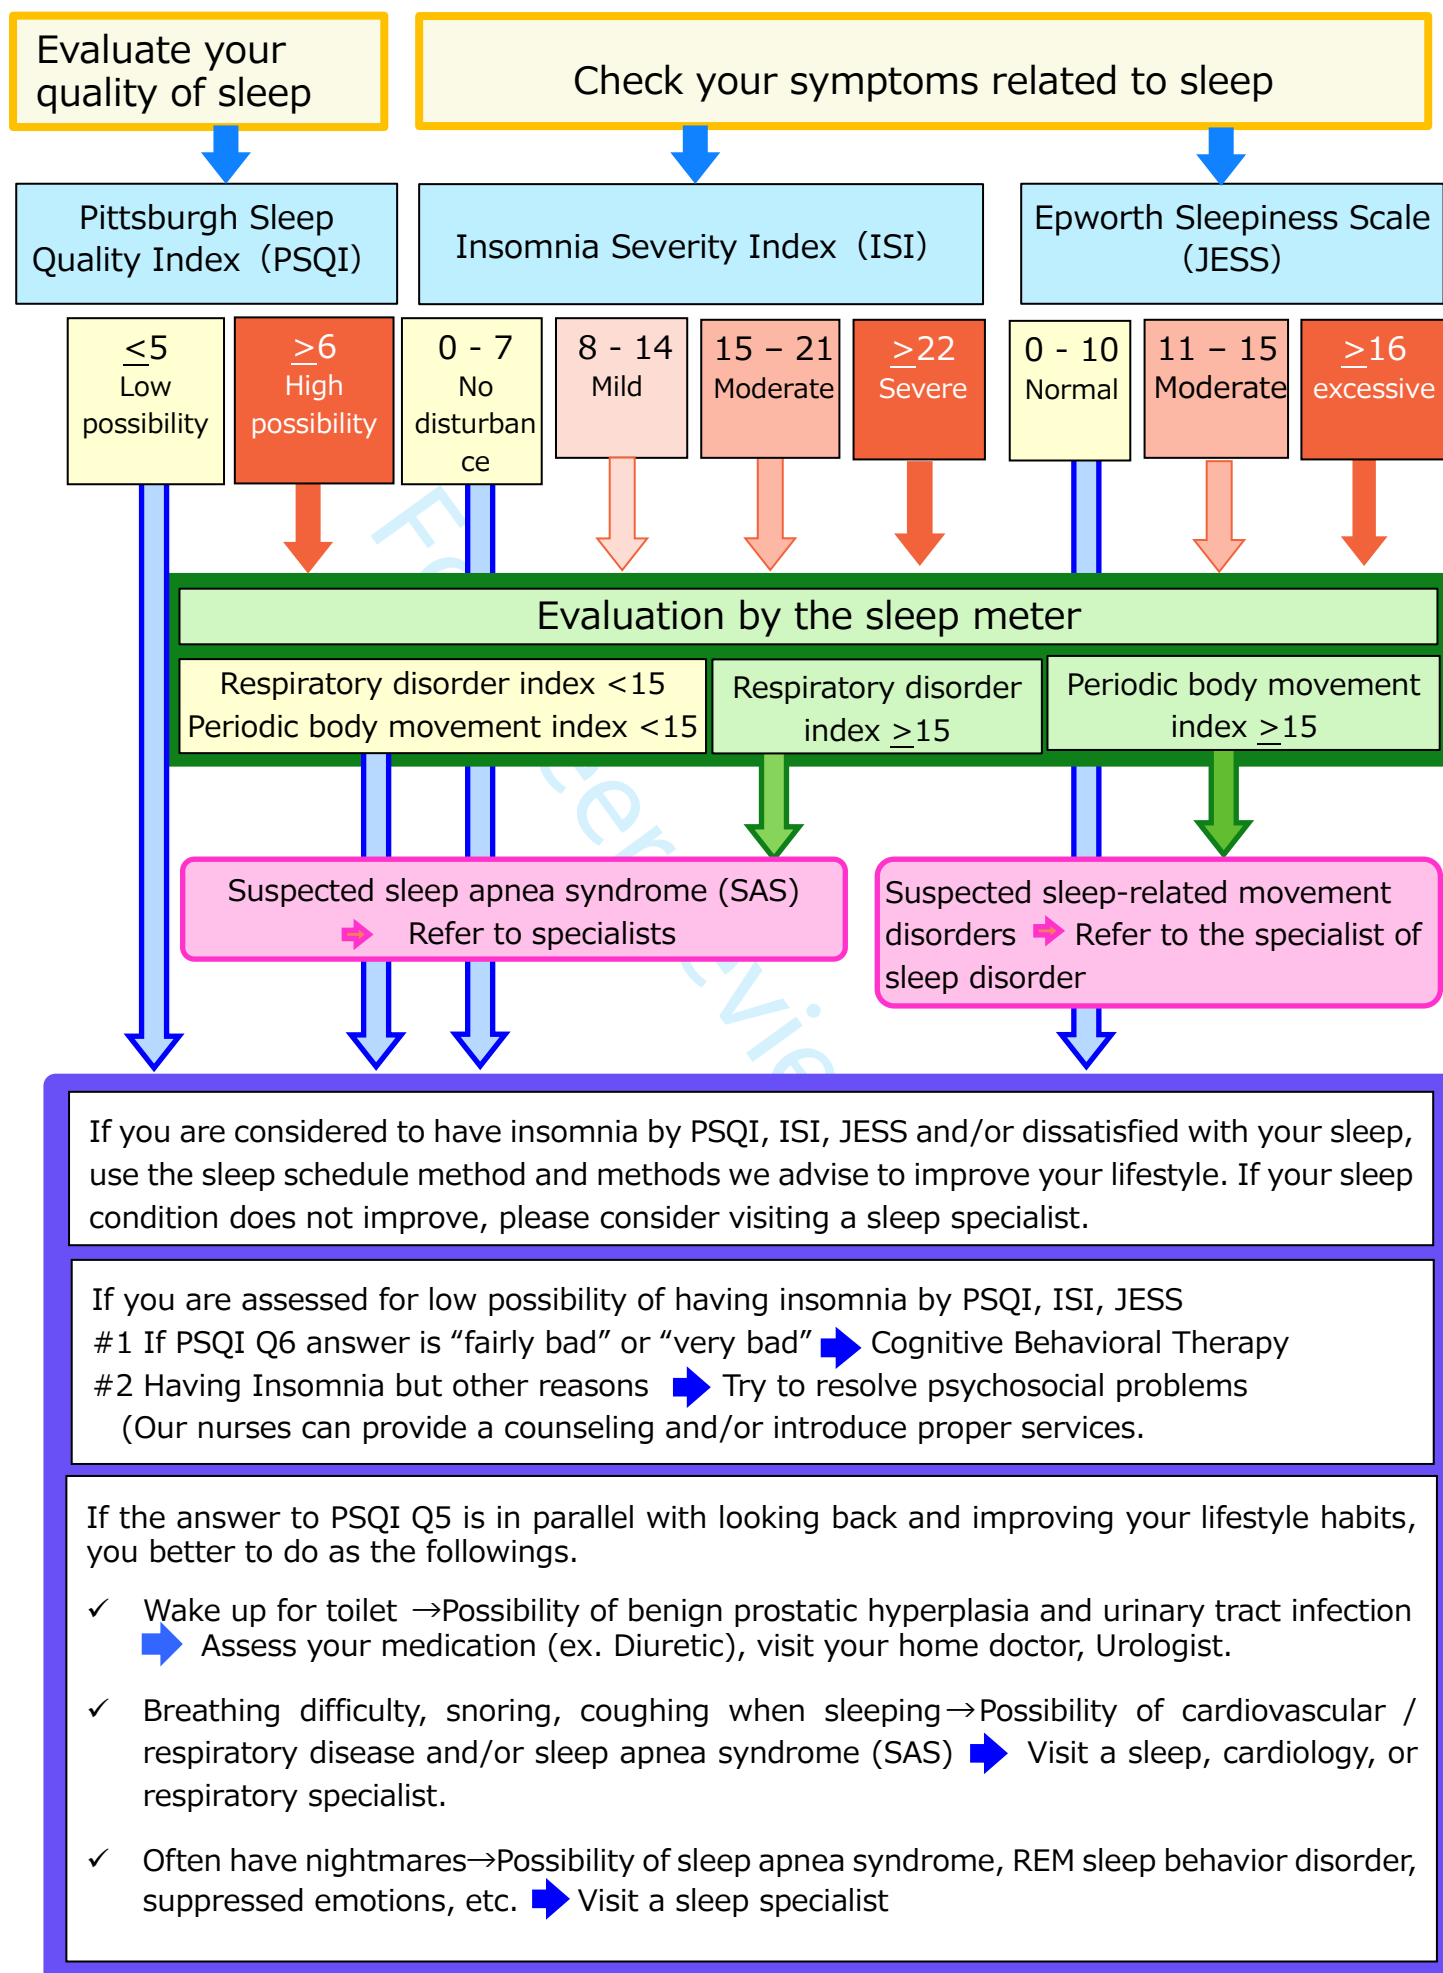

# Let's objectively evaluate the quantity and quality of sleep

Example Mr. A) •Take over-the-counter sleep-improving drugs  
 •He is aware that "the sleep is so bad that I drop the futon"

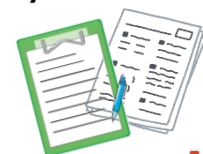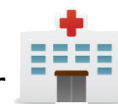

- Pittsburgh Sleep Quality Index(PSQI) 5 score···No sleep disorder
- Insomnia Severity Index (ISI) 8 score ····· Mild insomnia
- Measurement by the sleep meter

At home, place a sleep meter under a mattress and measure for a week, you can understand The quality of sleep during sleep, the state of breathing and heartbeat, and the following

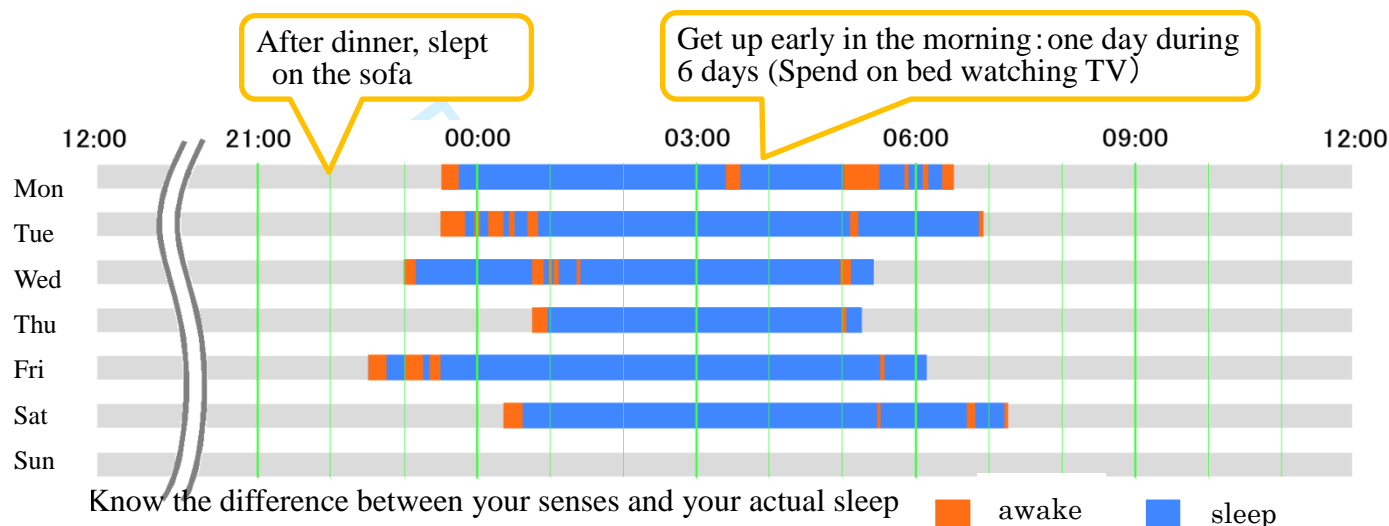

Know the difference between your senses and your actual sleep

awake sleep

| Items recorded   | Self-report | Measurement  | Remarks                                                      |
|------------------|-------------|--------------|--------------------------------------------------------------|
| Total sleep time | 5 hours     | 5 : 50 hours | Changes depending on individual differences and seasons.     |
| Time for bed     | 0 : 00      | 23 : 49      |                                                              |
| Sleep latency    | 20 min      | 12 min       |                                                              |
| Wake-up time     | 5 : 50      | 6 : 14       | It is desirable to have a constant time to wake up every day |

| Item Measured                  | Measured        | Desirable | Evaluation                                                                                                  |
|--------------------------------|-----------------|-----------|-------------------------------------------------------------------------------------------------------------|
| Sleep efficiency               | 90%             | 95% over  | Percentage of time to go to bed-get up from bed and actual sleep time                                       |
| Respiratory event index        | 8.1 times/h     |           | Possibility of SAS. $\geq 15$ is a guideline for consultation with a specialist                             |
| Periodic body movement index   | 12.5 times/h    |           | Possibility of periodic limb movement disorder. $\geq 15$ is a guideline for consultation with a specialist |
| Activity score                 | 29.2 counts/min |           | The higher the value, the more you are acting while sleeping.                                               |
| Respiratory rate               | Mean 15.9/min   | 12-20/min | Increases or decreases when there is apnea syndrome etc.                                                    |
| Heart rate (HR)                | Mean 57.8/min   | 50-90/min | If your average HR is high, you may have heart or thyroid disease, anemia, anxiety or depression.           |
| Wakefulness after sleep onset  | 20.3 min        | <20 min   | If it is too much, sleep efficiency (sleep quality) will decrease.                                          |
| Number of out-of-bed instances | 0.3 times       | <1 times  | The number of times you have left for toilet, etc. Possible effects of diuretics and enlarged prostate.     |

※ 1) EEG, 2) EOG, and 3) EMG are essential to medically evaluate the quantity and quality of sleep.



Based on your prior checklist, the category you checked is the problem area

[ Causes ]

[ Strategies ]

Job-related relationships,  
Workplace Environment

Counseling  
Get support

Social jet lag

Adjust circadian rhythm  
(Adjustment of sleeping environment)

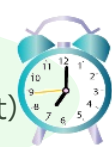

Thoughts and beliefs  
about sleep

Cognitive-Behavior Therapy

Personality and traits

Muscle relaxation method

Fitness

Massage

Yoga

Behavioral habits  
acquired

Change lifestyle  
(Drinking habit, time schedule)  
(Sleep schedule method)

Symptoms/Anxiety on  
physical condition

Visit a specialist  
Talk to a family doctor

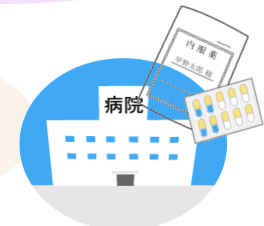

Anxiety and conflict in  
life

Psychotherapy  
( Mindfulness, etc.)

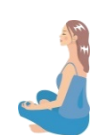

Personal/Social issues,  
conflict

Relaxation  
(Rest/Forest Bathing/Travel)

Family Problems  
(Conflict, anger, anxiety)

Family Therapy

Housework and  
childcare

Childcare services

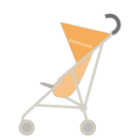

(Visit a care manager/  
Municipal government office)

Family illness and  
long-term care

Home Care Services

**STROBE 2007 (v4) checklist of items to be included in reports of observational studies in epidemiology\***  
**Checklist for cohort, case-control, and cross-sectional studies (combined)**

| Section/Topic             | Item # | Recommendation                                                                                                                                                                                                                                                                                                                                                                                                                                                         | Reported on page #                                                          |
|---------------------------|--------|------------------------------------------------------------------------------------------------------------------------------------------------------------------------------------------------------------------------------------------------------------------------------------------------------------------------------------------------------------------------------------------------------------------------------------------------------------------------|-----------------------------------------------------------------------------|
| Title and abstract        | 1      | (a) Indicate the study’s design with a commonly used term in the title or the abstract                                                                                                                                                                                                                                                                                                                                                                                 | p.1                                                                         |
|                           |        | (b) Provide in the abstract an informative and balanced summary of what was done and what was found                                                                                                                                                                                                                                                                                                                                                                    | p.3-4                                                                       |
| <b>Introduction</b>       |        |                                                                                                                                                                                                                                                                                                                                                                                                                                                                        |                                                                             |
| Background/rationale      | 2      | Explain the scientific background and rationale for the investigation being reported                                                                                                                                                                                                                                                                                                                                                                                   | p.5-7                                                                       |
| Objectives                | 3      | State specific objectives, including any pre-specified hypotheses                                                                                                                                                                                                                                                                                                                                                                                                      | p.7                                                                         |
| <b>Methods</b>            |        |                                                                                                                                                                                                                                                                                                                                                                                                                                                                        |                                                                             |
| Study design              | 4      | Present key elements of study design early in the paper                                                                                                                                                                                                                                                                                                                                                                                                                | p.7                                                                         |
| Setting                   | 5      | Describe the setting, locations, and relevant dates, including periods of recruitment, exposure, follow-up, and data collection                                                                                                                                                                                                                                                                                                                                        | p.7-8                                                                       |
| Participants              | 6      | (a) <i>Cohort study</i> —Give the eligibility criteria, and the sources and methods of selection of participants. Describe methods of follow-up<br><i>Case-control study</i> —Give the eligibility criteria, and the sources and methods of case ascertainment and control selection. Give the rationale for the choice of cases and controls<br><i>Cross-sectional study</i> —Give the eligibility criteria, and the sources and methods of selection of participants | p.7-8<br>This study was pre- and post-design study, and we followed STROBE. |
|                           |        | (b) <i>Cohort study</i> —For matched studies, give matching criteria and number of exposed and unexposed<br><i>Case-control study</i> —For matched studies, give matching criteria and the number of controls per case                                                                                                                                                                                                                                                 |                                                                             |
| Variables                 | 7      | Clearly define all outcomes, exposures, predictors, potential confounders, and effect modifiers. Give diagnostic criteria, if applicable                                                                                                                                                                                                                                                                                                                               | p.8-10                                                                      |
| Data sources/ measurement | 8*     | For each variable of interest, give sources of data and details of methods of assessment (measurement). Describe comparability of assessment methods if there is more than one group                                                                                                                                                                                                                                                                                   | p.8-10                                                                      |
| Bias                      | 9      | Describe any efforts to address potential sources of bias                                                                                                                                                                                                                                                                                                                                                                                                              | -                                                                           |
| Study size                | 10     | Explain how the study size was arrived at                                                                                                                                                                                                                                                                                                                                                                                                                              | p.8                                                                         |
| Quantitative variables    | 11     | Explain how quantitative variables were handled in the analyses. If applicable, describe which groupings were chosen and why                                                                                                                                                                                                                                                                                                                                           | p.13-14                                                                     |
| Statistical methods       | 12     | (a) Describe all statistical methods, including those used to control for confounding                                                                                                                                                                                                                                                                                                                                                                                  | p.13-14                                                                     |
|                           |        | (b) Describe any methods used to examine subgroups and interactions                                                                                                                                                                                                                                                                                                                                                                                                    | -                                                                           |
|                           |        | (c) Explain how missing data were addressed                                                                                                                                                                                                                                                                                                                                                                                                                            | -                                                                           |
|                           |        | (d) <i>Cohort study</i> —If applicable, explain how loss to follow-up was addressed                                                                                                                                                                                                                                                                                                                                                                                    | p.15                                                                        |

|                          |     |                                                                                                                                                                                                              |         |
|--------------------------|-----|--------------------------------------------------------------------------------------------------------------------------------------------------------------------------------------------------------------|---------|
|                          |     | <i>Case-control study</i> —If applicable, explain how matching of cases and controls was addressed                                                                                                           |         |
|                          |     | <i>Cross-sectional study</i> —If applicable, describe analytical methods taking account of sampling strategy                                                                                                 |         |
|                          |     | (e) Describe any sensitivity analyses                                                                                                                                                                        | p.13-14 |
| <b>Results</b>           |     |                                                                                                                                                                                                              |         |
| Participants             | 13* | (a) Report numbers of individuals at each stage of study—eg numbers potentially eligible, examined for eligibility, confirmed eligible, included in the study, completing follow-up, and analysed            | p.15    |
|                          |     | (b) Give reasons for non-participation at each stage                                                                                                                                                         | -       |
|                          |     | (c) Consider use of a flow diagram                                                                                                                                                                           | p.15    |
| Descriptive data         | 14* | (a) Give characteristics of study participants (eg demographic, clinical, social) and information on exposures and potential confounders                                                                     | p.15-16 |
|                          |     | (b) Indicate number of participants with missing data for each variable of interest                                                                                                                          | p.15    |
|                          |     | (c) <i>Cohort study</i> —Summarise follow-up time (eg, average and total amount)                                                                                                                             | p.15-16 |
| Outcome data             | 15* | <i>Cohort study</i> —Report numbers of outcome events or summary measures over time                                                                                                                          | p.16-17 |
|                          |     | <i>Case-control study</i> —Report numbers in each exposure category, or summary measures of exposure                                                                                                         | -       |
|                          |     | <i>Cross-sectional study</i> —Report numbers of outcome events or summary measures                                                                                                                           | -       |
| Main results             | 16  | (a) Give unadjusted estimates and, if applicable, confounder-adjusted estimates and their precision (eg, 95% confidence interval). Make clear which confounders were adjusted for and why they were included | p.16-17 |
|                          |     | (b) Report category boundaries when continuous variables were categorized                                                                                                                                    | -       |
|                          |     | (c) If relevant, consider translating estimates of relative risk into absolute risk for a meaningful time period                                                                                             | -       |
| Other analyses           | 17  | Report other analyses done—eg analyses of subgroups and interactions, and sensitivity analyses                                                                                                               | p.17-18 |
| <b>Discussion</b>        |     |                                                                                                                                                                                                              |         |
| Key results              | 18  | Summarise key results with reference to study objectives                                                                                                                                                     | p.18-21 |
| Limitations              | 19  | Discuss limitations of the study, taking into account sources of potential bias or imprecision. Discuss both direction and magnitude of any potential bias                                                   | p.21    |
| Interpretation           | 20  | Give a cautious overall interpretation of results considering objectives, limitations, multiplicity of analyses, results from similar studies, and other relevant evidence                                   | p.22    |
| Generalisability         | 21  | Discuss the generalisability (external validity) of the study results                                                                                                                                        | p.22    |
| <b>Other information</b> |     |                                                                                                                                                                                                              |         |
| Funding                  | 22  | Give the source of funding and the role of the funders for the present study and, if applicable, for the original study on which the present article is based                                                | p.24    |

\*Give information separately for cases and controls in case-control studies and, if applicable, for exposed and unexposed groups in cohort and cross-sectional studies.

1  
2  
3  
4  
5  
6  
7  
8  
9  
10  
11  
12  
13  
14  
15  
16  
17  
18  
19  
20  
21  
22  
23  
24  
25  
26  
27  
28  
29  
30  
31  
32  
33  
34  
35  
36  
37  
38  
39  
40  
41  
42  
43  
44  
45  
46

**Note:** An Explanation and Elaboration article discusses each checklist item and gives methodological background and published examples of transparent reporting. The STROBE checklist is best used in conjunction with this article (freely available on the Web sites of PLoS Medicine at <http://www.plosmedicine.org/>, Annals of Internal Medicine at <http://www.annals.org/>, and Epidemiology at <http://www.epidem.com/>). Information on the STROBE Initiative is available at [www.strobe-statement.org](http://www.strobe-statement.org).

For peer review only
