# Supplementary material for: Can a sleep disorder intervention-embedded self-management programme contribute to improve management of diabetes? A pilot single-arm pretest and post-test study
Source: PubMed Central journal article supplement — BMJ Open. 2021 Sep 21;11(9):e045783. doi: 10.1136/bmjopen-2020-045783 (PMC8458311; doi:10.1136/bmjopen-2020-045783), 2021-09-21
Supplement: bmjopen-2020-045783supp001.pdf [file bmjopen-2020-045783supp001.pdf]

## Supplemental file 1

## Evaluation of a sleep metre result (Example)

- Created based on the company's format (NEMURI SCAN NN-1310; Paramount bed Co., Ltd)
- Evaluation criteria are set by Paramount bed Co., Ltd.
- We converted A to 4, B to 3, C to 2, and D to 1, for calculation purpose.
- Total evaluation reflects the worst evaluation item among all items.

Date: XX, XX, 20XX Mr. xxxxx.

Total Evaluation: D (Improvement required)

| Sleep index                    | Value     | Evaluation | Criteria                                                                                                                                                                                                                            |
|--------------------------------|-----------|------------|-------------------------------------------------------------------------------------------------------------------------------------------------------------------------------------------------------------------------------------|
| Total sleep time               | 6h 16min  | B          | The total amount of time you actually slept from bedtime to wake-up time.<br>A: $\geq 6.5$ h, $< 8$ h,<br>B: $\geq 6$ h, $< 6.5$ h or $\geq 8$ h, $< 9$ h<br>C: $\geq 5$ h, $< 6$ h or $\geq 9$ , $< 10$<br>D: $< 5$ h or $\geq 10$ |
| Total time in bed              | 8h 13min  | B          | The total amount of time from bedtime to wake-up time.<br>Criteria: Same as the total sleep time                                                                                                                                    |
| Time for bed (bedtime)         | 22:49     | reference  | Time you laid on bed                                                                                                                                                                                                                |
| Wake-up time                   | 7:03      | reference  | Time you left from bed                                                                                                                                                                                                              |
| Sleep latency                  | 23.4min   | C          | The time it took from bedtime to falling asleep.<br>A: $< 10$ min, B: $\geq 10$ min, $< 20$ min,<br>C: $\geq 20$ min, $< 30$ min, D: $\geq 30$ min                                                                                  |
| Sleep efficiency               | 76.2%     | C          | Percentage of time actually asleep from bedtime to wake up.<br>(Total sleep time / Total time in bed x 100 [%])<br>A: $\geq 95$ %, B: $\geq 85$ %, $< 95$ %<br>C: $\geq 75$ %, $< 85$ %, D: $< 75$ %                                |
| Wakefulness after sleep onset  | 92.1min   | D          | The total amount of time you woke up in the middle of your sleep between falling asleep and waking up.<br>A: $< 10$ min, B: $\geq 10$ min, $< 20$ min<br>C: $\geq 20$ min, $< 40$ min, D: $\geq 40$ min                             |
| Number of out-of-bed instances | 1.5 times | C          | The number of times you have left from bed for toilet, etc.<br>A: 0 time, B: $< 1$ time,<br>C: $\geq 1$ time, $< 2$ times, D: $\geq 2$ times                                                                                        |
